1 The dates of the sudden 2020 Autumn COVID-19 boost in European  
2 countries is linked to latitudes and not to temperatures.

3

4 Running title: COVID-19 second wave and latitude

5

6 Stephan Walrand, cliniques universitaires Saint-Luc, Brussels, Belgium

7

8 corresponding author:

9 [stephan.walrand@uclouvain.be](mailto:stephan.walrand@uclouvain.be)

10 [phone : 32 495 680813](tel:32495680813)

11

12

13 **Abstract :**

14 Purpose: Determining the triggering factor of the sudden boost of the daily reported new COVID-19  
15 cases arising in most European countries during 2020 Autumn.

16 Methods: The dates of the boost were determined using an automatic fitting of the two last months  
17 reported daily new cases in 18 European countries of latitude ranging from 39° to 62°.

18 Results: The present study proves no correlation between the country boost date and its 2 weeks  
19 preceding temperature, but shows an impressive linear correlation with its latitude. The country  
20 boost date corresponds to the time when its sun UV daily dose drops below 30% of that of 0°  
21 latitude.

22 Conclusions: Previous studies compared covid-19 severity between different populations. In  
23 contrary, the date of the boost is an intrapopulation observation and can thus be only triggered by a  
24 parameter globally affecting the population, i.e. the sun UV daily dose decreases. This result supports  
25 low vitamin blood D level as a real primary cause of COVID-19 severity. Europe and US could thus  
26 sink into a long crisis, since they will get back above the October sun UV dose only end 2021 March.

27

28

29 **Keywords:** covid-19, latitude, vitamin D, second wave

## 30 Introduction

31 Most European countries underwent an unexpected spectacular boost of the daily new COVID-19  
32 cases in autumn (Fig. 1), imposing in emergency new confinement rules

33

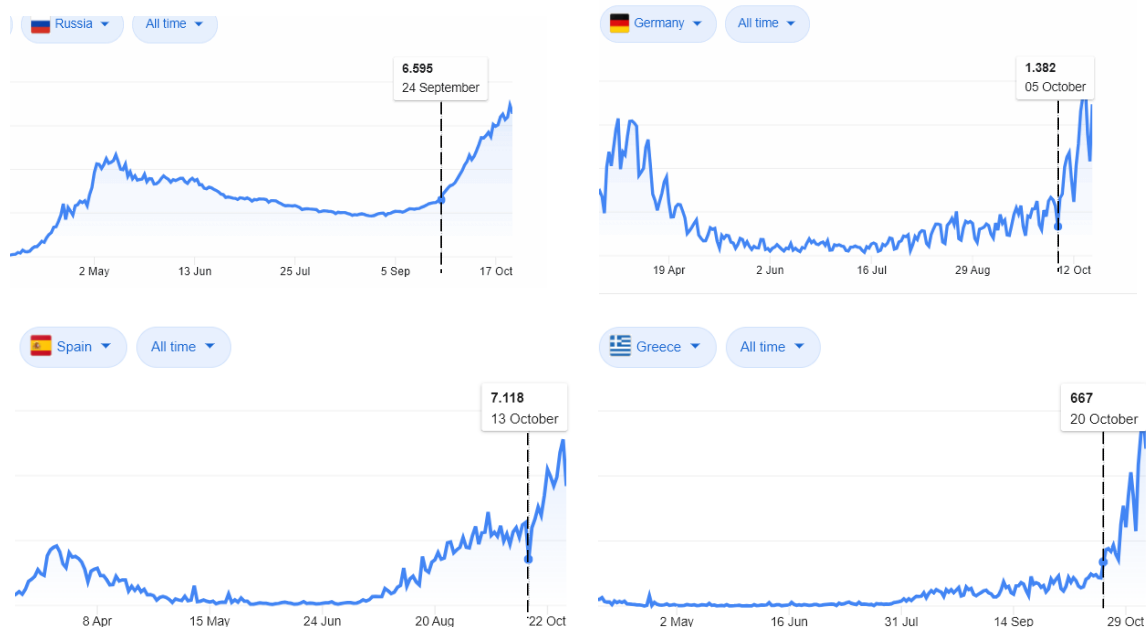

34 Figure 1: Examples of daily new COVID-19 cases (extracted from the Google home page when  
35 searching "covid"). All curves exhibit a clear boost of the growing rates around October.

36

37 The most common reported explanation is the decreasing temperature. The aim of this data analysis  
38 study is to challenge this assumption against a pure country latitude impact.

39

## 40 Material and method

### 41 Data sources

42 The daily reported country new COVID-19 cases were obtained by digitalizing the curves from the  
43 Johns Hopkins coronavirus resource center (<https://coronavirus.jhu.edu/map.html>) using Digitizelt  
44 ([www.digitizelt.de](http://www.digitizelt.de)).

45 The country population weighted center (PWC) latitudes were obtained from the Baylor University  
46 population resource  
47 ([http://cs.ecs.baylor.edu/~hamerly/software/europe\\_population\\_weighted\\_centers.txt](http://cs.ecs.baylor.edu/~hamerly/software/europe_population_weighted_centers.txt))

48 The averaged 2 weeks temperatures preceding the boost dates were derived from weather.com.

49 The theoretical sun UV daily dose for vitamin D production, as a function of latitude and of the day of  
50 the year was derived by interpolation from [1].

51

### 52 Boost date determination

53 The date of the growing rate boost was automatically determined by fitting the two last months of  
54 the daily new COVID-19 cases with:

$$55 \quad N_c e^{(\alpha_c + (\beta_c - \alpha_c) l(t - t_c)) t} \quad (1)$$

56 where  $l$  is the logistic function:

$$57 \quad l(t - t_c) = \frac{1}{1 + e^{-\gamma(t - t_c)}} \quad (2)$$

58  $t_c$  is considered as the boost date of the country  $c$ , i.e. the date when the exponential coefficient,  
59 coming from the initial value  $\alpha_c$ , crosses the value  $\frac{\alpha_c + \beta_c}{2}$  before tending towards  $\beta_c$  when  $t \rightarrow \infty$ .  $\gamma$   
60 is the steepness of this changing.  $\gamma$  was assumed country independent as we search for an impact of  
61 the latitude of its own. This further allows to prevent an over-fitting of the data noise by a steepness  
62 tuned for each country.

63 Note that as the exponential coefficient varies with time, the doubling time around the boost date is  
64 not simply  $\ln(2)$  divided by this coefficient.

65

## 66 Results:

67 Table 1 shows the fitting results (all the data and fitting process is provided in the supplementary xlsx  
68 file).

| country     |                                                                                     | temp.<br>[C] | PWC lat.<br>[deg] | date    | day | Sun<br>UV<br>[%] |
|-------------|-------------------------------------------------------------------------------------|--------------|-------------------|---------|-----|------------------|
| Greece      |  | 23.4         | 38.7              | oct 22  | 296 | 36.0             |
| Portugal    |  | 19.9         | 39.7              | oct 24  | 299 | 33.8             |
| Spain       |  | 17.6         | 39.8              | oct 28  | 302 | 31.7             |
| Bulgaria    |  | 17.5         | 42.8              | nov 01  | 306 | 26.3             |
| Italy       |  | 20.6         | 42.9              | oct 16  | 291 | 34.1             |
| Serbia      |  | 16.0         | 43.8              | oct 20  | 294 | 30.7             |
| Croatia     |  | 17.4         | 45.3              | oct 16  | 291 | 30.8             |
| Slovenia    |  | 14.5         | 46.2              | oct 15  | 289 | 30.1             |
| Switzerland |  | 14.0         | 47.0              | oct 11  | 285 | 31.0             |
| France      |  | 14.9         | 47.2              | oct 22  | 296 | 25.4             |
| Austria     |  | 15.4         | 47.8              | oct 16  | 290 | 27.6             |
| Belgium     |  | 18.6         | 50.8              | oct 02  | 277 | 30.7             |
| Germany     |  | 14.9         | 50.9              | oct 14  | 289 | 24.5             |
| Netherland  |  | 18.3         | 52.1              | oct 02  | 277 | 29.0             |
| UK          |  | 21.1         | 52.8              | sept 27 | 271 | 30.7             |
| Russia      |  | 15.2         | 54.3              | sept 21 | 266 | 32.4             |
| Sweden      |  | 17.3         | 59.0              | sept 21 | 266 | 25.9             |
| Finland     |  | 14.1         | 61.8              | sept 20 | 264 | 21.9             |

69

70 Table 1. Temp: mean country temperature during the 2 weeks preceding its COVID-19 boost date.  
71 PWC lat: latitude of the country PWC. day: corresponding day of the year. Sun: theoretical sun UV  
72 daily dose at the boost date, expressed as a fraction at the PWC latitude versus the latitude 0°.

73

74 Fig. 2A clearly proves no correlation with temperatures, while fig. 2B clearly shows an impact of the  
75 country latitude.

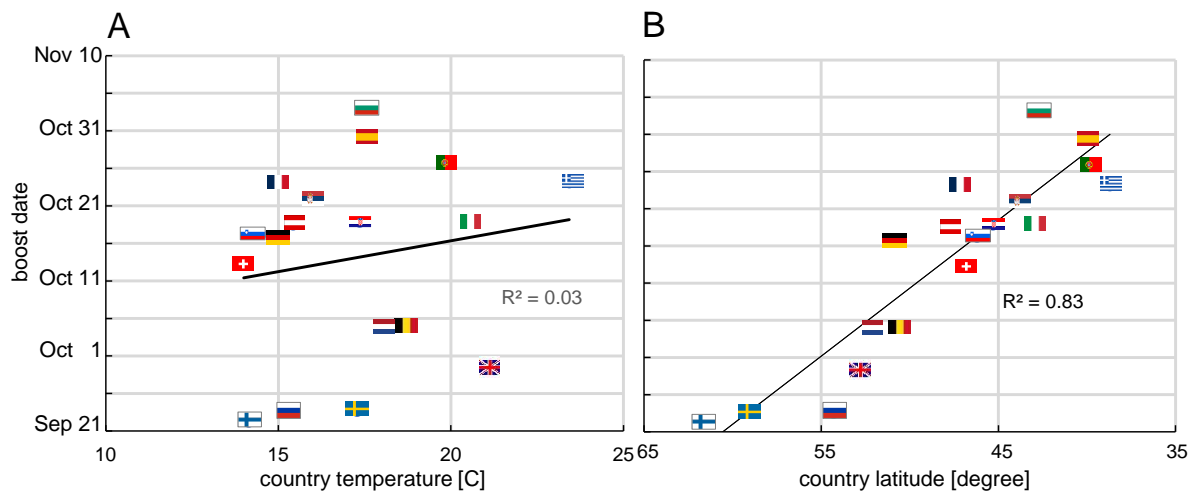

76 Figure 2: COVID-19 boost date as a function of the country mean temperature during the 2  
77 preceding weeks (A), and as a function of the country PWC latitude (B). Use of flags allows linking  
78 country positions on the two graphs.

79

80 Fig. 3 clearly shows that the boost dates set on the theoretical sun UV daily dose as a function of the  
81 latitude evidences an impact of the sun UV daily dose.

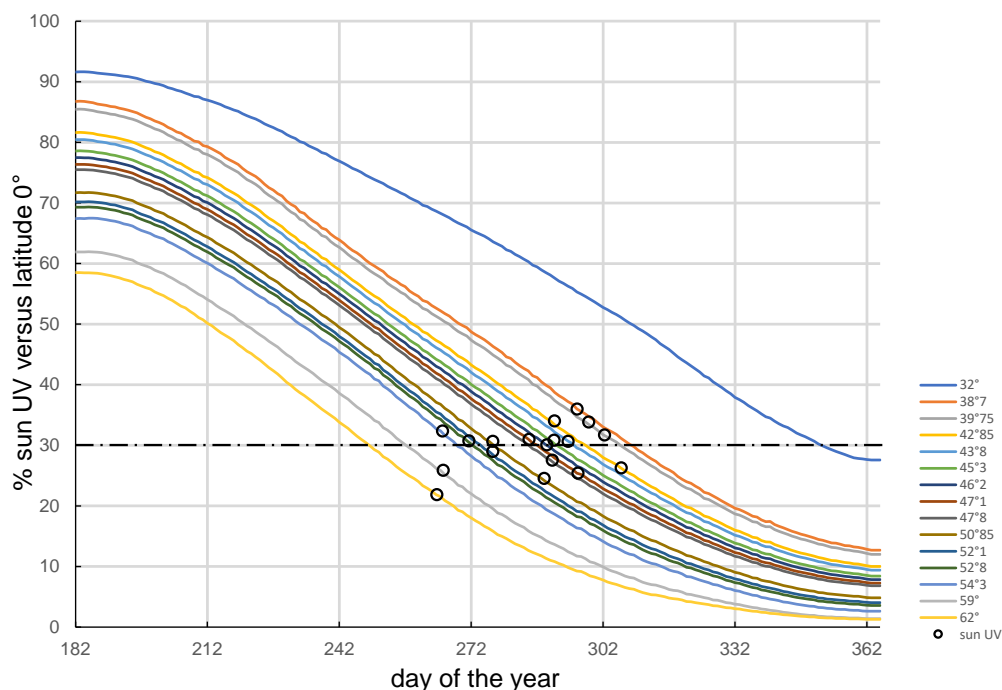

82

83 Figure 3: Solid curves: theoretical sun UV daily dose for vitamin D skin production under a clear sky  
84 corresponding to the 18 PWC country latitudes plus the 31° latitude (derived from [1]). Black circles:  
85 country boost dates positioned on their corresponding latitude curve. Black dot-dash line  
86 corresponds to the averaged countries sun UV daily doses at their boost date.

87  
88  
89  
90

Fig. 4 shows that the day of the second wave boost is well predicted by the moment when the sun UV daily dose of the country becomes lower than 30% of that at latitude 0°.

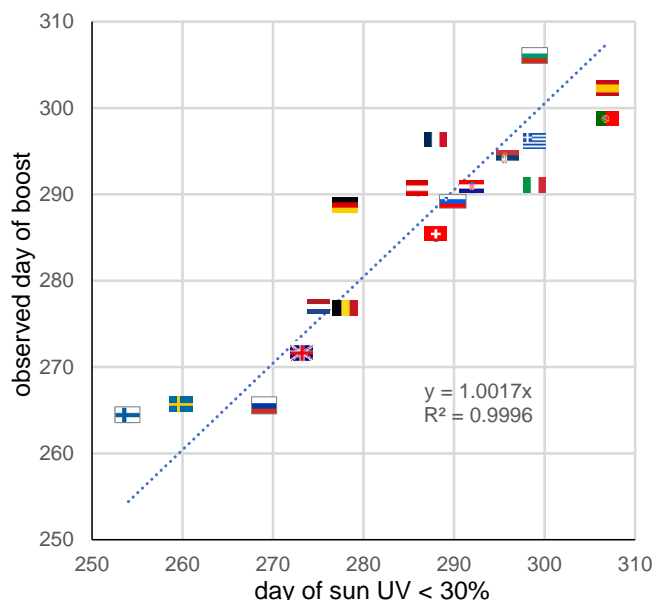

91 Figure 4: observed day of the second wave covid-19 boost as a function of the day when the country  
92 sun UV daily dose drops lower than 30% of that at latitude 0°. Trendline forced to intercept (0,0).

93

#### 94 Discussion:

95 Many studies support an impact of low vitamin D blood level on the respiratory impairment in  
96 coronavirus or virus diseases [2], and also recently for the COVID-19 pandemic [3]. Low vitamin D  
97 blood level is also more present in populations at risk: i.e. aged people [4], obese patients [5],  
98 coloured skin people living in high latitude countries [6] and diabetic patients [7].

99 However these studies compared the covid-19 severity between different populations. They cannot  
100 thus discriminate whether the vitamin D blood level is a primary cause of covid-19 severity or only a  
101 consequence associated to another population weakness being the primary severity cause.

102 In contrary the date of the boost is an intrapopulation observation and can be only triggered by a  
103 parameter globally affecting this population. As there is no temperature correlation but an  
104 impressive latitude correlation (fig. 2), the remaining common parameter affecting these populations  
105 at different times depending on the latitude is the sun UV daily dose.

106 The present study supports thus that lower vitamin D blood level is one of the primary cause of  
107 increased COVID-19 severity. By increasing the coronavirus load in the respiratory track, the  
108 contagiousness in the population is also increased explaining the wave boost.

109 The results are also in line with the low population mortality observed within  $\pm 35^\circ$  latitudes [8], and  
110 also with the confinement success reported in Hubei which is located on the  $31^\circ$  latitude, regarding  
111 that these regions are most of the year above the sun UV daily dose threshold (fig. 3: black dot-dash  
112 line).

113

114 **Conclusion:**

115 To the best of our knowledge, the present study is the first reported evidence that lower vitamin D  
116 blood level is one of the primary causes of covid-19 severity.

117 Europe, and US as well, are starting this autumn a long covid-19 crisis as they will get back above the  
118 October sun UV daily dose only end 2021 March.

119 The bet to reduce the pandemic severity during the coming winter using controlled preventive  
120 vitamin D supplementation could be considered [10].

121

122 **References:**

123 1. Grigalavicius M, Juzeniene A, Baturaite Z, Dahlback A, Moan J. Biologically efficient solar radiation:  
124 vitamin D production and induction of cutaneous malignant melanoma. *Dermato-endocrinology*.  
125 2013;5:150-8.

126 2. Martineau Adrian R, Jolliffe David A, Richard HL et al (2017) Vitamin D supplementation to prevent  
127 acute respiratory tract infections: systematic review and meta-analysis of individual participant data.  
128 *BMJ* 356:i6583.

129 3. Grant WB, Lahore H, McDonnell SL, Baggerly CA, French CB, Aliano JL, Bhattoa HP. Evidence that  
130 vitamin D supplementation could reduce risk of influenza and COVID-19 infections and deaths.  
131 *Nutrients*. 2020 Apr;12(4):988.

132 4. Ilie PC, Stefanescu S, Smith L. The role of vitamin D in the prevention of coronavirus disease 2019  
133 infection and mortality. *Aging Clinical and Experimental Research*. 2020 May 6:1-4.

134 5. Carter SJ, Baranauskas MN, Fly AD. Considerations for Obesity, Vitamin D, and Physical Activity  
135 Amid the COVID-19 Pandemic. *Obesity*. 2020 May 21.

136 6. Boucher BJ. Vitamin D status as a predictor of Covid-19 risk in Black, Asian and other ethnic  
137 minority groups in the UK. *Diabetes/Metabolism Research and Reviews*. 2020 Jul 31:e3375.

138 7. Payne J, Ray R, Watson D, Delille C, Rimler E, Cleveland J, Lynn M, Tangpricha V, Srivastava S.  
139 Vitamin D insufficiency in diabetic retinopathy. *Endocrine Practice*. 2012 Mar 1;18(2):185-93.

140 8. Rhodes JM, Subramanian S, Laird E, Kenny RA. low population mortality from COVID-19 in  
141 countries south of latitude 35 degrees North supports vitamin D as a factor determining severity.  
142 *Alimentary pharmacology & therapeutics*. 2020;51:1434-7.

143 9. Lewiecki EM. Vitamin D and COVID-19: Is something better than nothing?. *Osteoporosis and*  
144 *Sarcopenia*. 2020. <https://doi.org/10.1016/j.afos.2020.08.005>
