# Supplementary material for: The autumn COVID-19 surge dates in Europe are linked to latitudes and not to temperature, nor to humidity, pointing vitamin D as a contributing factor
Source: bioRxiv or medRxiv preprint supplement (doi:10.1101/2020.10.28.20221176), 2020-12-02
Supplement: Supplementary file [file media-1.pdf]

| Jeu de do | Jeu de do | fit      | diff     | W | a0         |           |
|-----------|-----------|----------|----------|---|------------|-----------|
| 2.30E+02  | 2.46E+02  | 5.12E+02 | 0.00E+00 | 0 | N          | 0.00000   |
| 2.34E+02  | 2.86E+02  | 5.29E+02 | 0.00E+00 | 0 | alpha      | 52.67231  |
| 2.35E+02  | 1.67E+02  | 5.36E+02 | 0.00E+00 | 0 | beta-alpha | 0.00987   |
| 2.38E+02  | 1.97E+02  | 5.51E+02 | 0.00E+00 | 0 | gama       | 0.00419   |
| 2.39E+02  | 3.05E+02  | 5.58E+02 | 0.00E+00 | 0 | tc         | 0.25200   |
| 2.39E+02  | 2.96E+02  | 5.56E+02 | 0.00E+00 | 0 |            | 290.45113 |
| 2.41E+02  | 2.07E+02  | 5.66E+02 | 0.00E+00 | 0 | chi2       | 17.451    |
| 2.42E+02  | 4.14E+02  | 5.72E+02 | 0.00E+00 | 0 |            | 2.97E+06  |
| 2.42E+02  | 1.38E+02  | 5.76E+02 | 0.00E+00 | 0 |            |           |
| 2.44E+02  | 2.46E+02  | 5.83E+02 | 0.00E+00 | 0 |            |           |
| 2.44E+02  | 1.97E+02  | 5.88E+02 | 0.00E+00 | 0 |            |           |
| 2.46E+02  | 3.84E+02  | 5.99E+02 | 0.00E+00 | 0 |            |           |
| 2.49E+02  | 3.05E+02  | 6.14E+02 | 0.00E+00 | 0 |            |           |
| 2.49E+02  | 1.48E+02  | 6.18E+02 | 0.00E+00 | 0 | thre       | 260       |

|          |          |
|----------|----------|
| 2.50E+02 | 5.32E+02 |
| 2.52E+02 | 5.22E+02 |
| 2.53E+02 | 6.21E+02 |
| 2.54E+02 | 4.83E+02 |
| 2.55E+02 | 7.98E+02 |
| 2.56E+02 | 4.83E+02 |
| 2.57E+02 | 3.45E+02 |
| 2.58E+02 | 7.29E+02 |
| 2.60E+02 | 7.59E+02 |
| 2.61E+02 | 7.98E+02 |
| 2.63E+02 | 5.52E+02 |
| 2.66E+02 | 6.31E+02 |
| 2.67E+02 | 8.57E+02 |
| 2.67E+02 | 7.00E+02 |
| 2.69E+02 | 7.00E+02 |
| 2.71E+02 | 5.42E+02 |
| 2.72E+02 | 7.98E+02 |
| 2.73E+02 | 8.57E+02 |
| 2.74E+02 | 6.90E+02 |
| 2.76E+02 | 9.85E+02 |

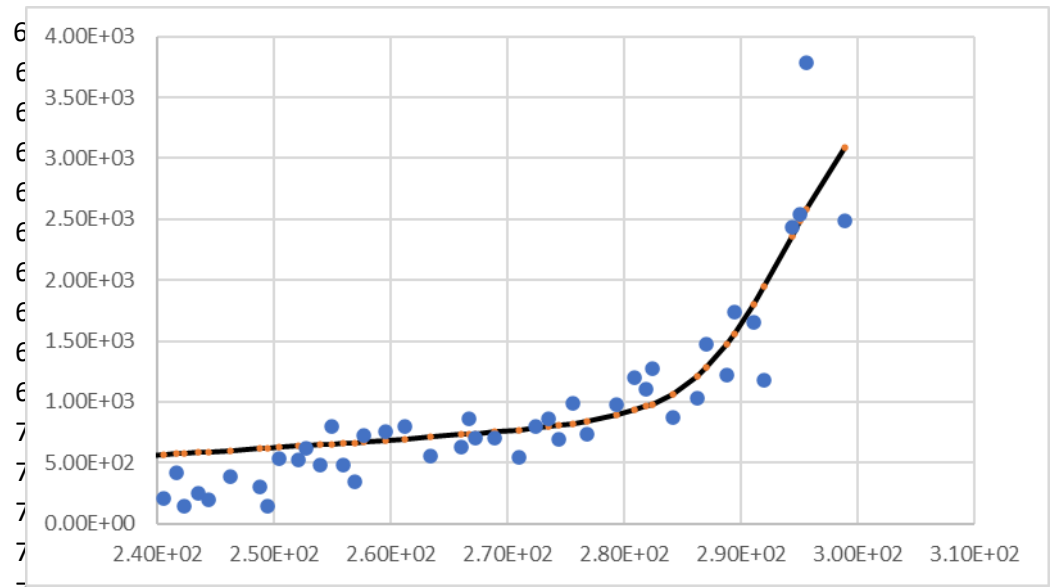

|          |          |   |
|----------|----------|---|
| 7.53E+02 | 2.85E+03 | 1 |
| 7.71E+02 | 5.25E+04 | 1 |
| 7.85E+02 | 1.81E+02 | 1 |
| 7.96E+02 | 3.74E+03 | 1 |
| 8.07E+02 | 1.38E+04 | 1 |
| 8.23E+02 | 2.65E+04 | 1 |

austria

| Jeu de do | Jeu de do | fit      | diff     | W | a0         |           |
|-----------|-----------|----------|----------|---|------------|-----------|
| 2.10E+02  | 1.56E+02  | 1.58E+01 | 0.00E+00 | 0 | N          | 0.00000   |
| 2.11E+02  | 6.13E+02  | 1.70E+01 | 0.00E+00 | 0 | alpha      | 0.07315   |
| 2.13E+02  | 7.03E+02  | 1.97E+01 | 0.00E+00 | 0 | beta-alpha | 0.00172   |
| 2.14E+02  | 3.83E+02  | 2.17E+01 | 0.00E+00 | 0 | gama       | 0.25200   |
| 2.16E+02  | 4.46E+02  | 2.47E+01 | 0.00E+00 | 0 | tc         | 276.94690 |
| 2.17E+02  | 3.08E+02  | 2.68E+01 | 0.00E+00 | 0 |            |           |
| 2.19E+02  | 8.94E+02  | 3.03E+01 | 0.00E+00 | 0 | chi2       | 5.50E+07  |
| 2.21E+02  | 5.82E+02  | 3.50E+01 | 0.00E+00 | 0 |            |           |
| 2.22E+02  | 7.89E+02  | 3.81E+01 | 0.00E+00 | 0 |            |           |
| 2.24E+02  | 3.73E+02  | 4.33E+01 | 0.00E+00 | 0 |            |           |
| 2.25E+02  | 6.49E+02  | 4.66E+01 | 0.00E+00 | 0 |            |           |
| 2.25E+02  | 5.10E+02  | 4.97E+01 | 0.00E+00 | 0 |            |           |
| 2.28E+02  | 7.51E+02  | 5.86E+01 | 0.00E+00 | 0 |            |           |
| 2.30E+02  | 2.31E+02  | 6.85E+01 | 0.00E+00 | 0 | thre       | 265       |
| 2.35E+02  | 5.05E+02  | 9.98E+01 | 0.00E+00 | 0 |            |           |

3.947

|          |          |          |          |   |
|----------|----------|----------|----------|---|
| 2.37E+02 | 8.89E+01 | 1        |          |   |
| 2.41E+02 | 3.64E+02 | 1        |          |   |
| 2.44E+02 | 1.54E+02 | 1        |          |   |
| 2.51E+02 | 3.23E+02 | 3        |          |   |
| 2.53E+02 | 8.06E+02 | 3        |          |   |
| 2.56E+02 | 9.08E+02 | 4        |          |   |
| 2.57E+02 | 8.73E+02 | 5        |          |   |
| 2.59E+02 | 4.22E+02 | 5        |          |   |
| 2.61E+02 | 2.12E+03 | 6        |          |   |
| 2.63E+02 | 1.04E+03 | 7        |          |   |
| 2.64E+02 | 1.49E+03 | 8        |          |   |
| 2.65E+02 | 1.01E+03 | 8        |          |   |
| 2.66E+02 | 1.84E+03 | 9        |          |   |
| 2.67E+02 | 1.66E+03 | 1        |          |   |
| 2.69E+02 | 2.15E+03 | 1.27E+03 | 7.64E+05 | 1 |
| 2.71E+02 | 1.28E+03 | 1.47E+03 | 3.45E+04 | 1 |
| 2.72E+02 | 1.07E+03 | 1.63E+03 | 3.06E+05 | 1 |
| 2.73E+02 | 1.76E+03 | 1.79E+03 | 6.86E+02 | 1 |
| 2.74E+02 | 1.14E+03 | 2.05E+03 | 8.25E+05 | 1 |
| 2.75E+02 | 2.73E+03 | 2.24E+03 | 2.38E+05 | 1 |
| 2.77E+02 | 3.32E+03 | 2.69E+03 | 3.93E+05 | 1 |
| 2.79E+02 | 1.90E+03 | 3.22E+03 | 1.76E+06 | 1 |

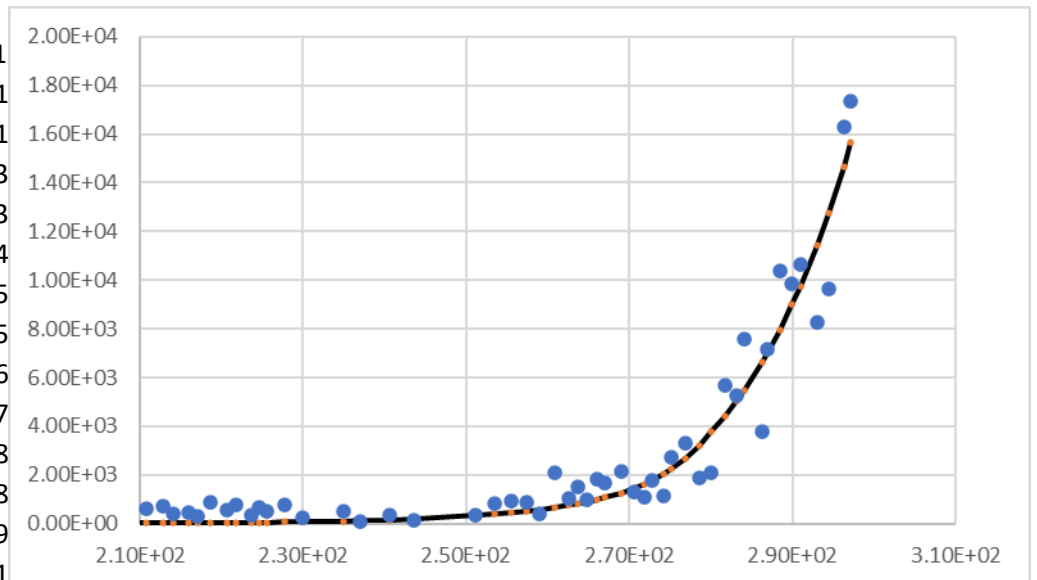

belgium

| Jeu de do | Jeu de do fit | diff     | W        | a0 |                    |
|-----------|---------------|----------|----------|----|--------------------|
| 1.98E+02  | 1.05E+03      | 2.98E+03 | 0.00E+00 | 0  | 0.00000            |
| 2.02E+02  | 1.22E+03      | 3.23E+03 | 0.00E+00 | 0  | N 47.92139         |
| 2.06E+02  | 1.23E+03      | 3.54E+03 | 0.00E+00 | 0  | alpha 0.02086      |
| 2.09E+02  | 1.56E+03      | 3.78E+03 | 0.00E+00 | 0  | beta-alpha 0.00349 |
| 2.13E+02  | 2.20E+03      | 4.04E+03 | 0.00E+00 | 0  | gama 0.25200       |
| 2.14E+02  | 2.53E+03      | 4.17E+03 | 0.00E+00 | 0  | tc 296.30988       |
| 2.17E+02  | 3.34E+03      | 4.42E+03 | 0.00E+00 | 0  | chi2 9.84E+08      |
| 2.19E+02  | 3.02E+03      | 4.59E+03 | 0.00E+00 | 0  |                    |
| 2.20E+02  | 4.47E+03      | 4.72E+03 | 0.00E+00 | 0  |                    |
| 2.21E+02  | 5.43E+03      | 4.84E+03 | 0.00E+00 | 0  |                    |
| 2.24E+02  | 4.31E+03      | 5.10E+03 | 0.00E+00 | 0  |                    |
| 2.25E+02  | 5.44E+03      | 5.22E+03 | 0.00E+00 | 0  |                    |
| 2.26E+02  | 2.39E+03      | 5.29E+03 | 0.00E+00 | 0  |                    |
| 2.27E+02  | 5.44E+03      | 5.45E+03 | 0.00E+00 | 0  | thre 230           |
| 2.30E+02  | 7.21E+03      | 5.79E+03 | 0.00E+00 | 0  |                    |
| 2.32E+02  | 5.77E+03      | 6.02E+03 | 6.20E+04 | 1  |                    |

23.310

|          |          |
|----------|----------|
| 2.26E+02 | 3.35E+03 |
| 2.28E+02 | 5.60E+03 |
| 2.31E+02 | 8.34E+03 |
| 2.32E+02 | 5.77E+03 |
| 2.34E+02 | 4.65E+03 |
| 2.36E+02 | 5.94E+03 |
| 2.38E+02 | 7.71E+03 |
| 2.39E+02 | 9.64E+03 |
| 2.41E+02 | 7.71E+03 |
| 2.42E+02 | 4.50E+03 |
| 2.46E+02 | 1.05E+04 |
| 2.47E+02 | 9.81E+03 |
| 2.49E+02 | 1.16E+04 |
| 2.49E+02 | 8.37E+03 |
| 2.50E+02 | 7.41E+03 |
| 2.52E+02 | 9.66E+03 |
| 2.57E+02 | 1.35E+04 |
| 2.58E+02 | 1.19E+04 |
| 2.58E+02 | 9.99E+03 |
| 2.59E+02 | 6.62E+03 |
| 2.60E+02 | 1.02E+04 |

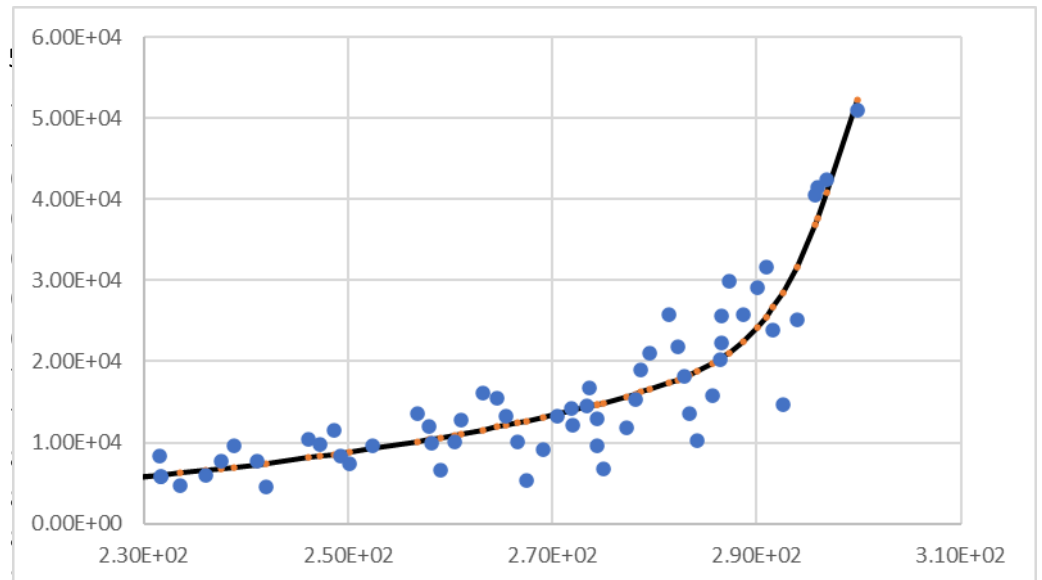

|          |          |   |
|----------|----------|---|
| 8.84E+03 | 2.07E+06 | 1 |
| 9.28E+03 | 1.48E+05 | 1 |
| 1.02E+04 | 1.14E+07 | 1 |
| 1.04E+04 | 2.32E+06 | 1 |
| 1.04E+04 | 2.06E+05 | 1 |
| 1.06E+04 | 1.62E+07 | 1 |
| 1.10E+04 | 6.38E+05 | 1 |

France

| Jeu de do | Jeu de do | fit      | diff     | W | a0         |           |
|-----------|-----------|----------|----------|---|------------|-----------|
| 2.41E+02  | 1.57E+02  | 5.44E+01 | 0.00E+00 | 0 | N          | 0.00046   |
| 2.43E+02  | 5.15E+01  | 5.77E+01 | 0.00E+00 | 0 | alpha      | 0.04835   |
| 2.45E+02  | 1.90E+02  | 6.34E+01 | 0.00E+00 | 0 | beta-alpha | 0.04751   |
| 2.48E+02  | 1.94E+02  | 7.48E+01 | 0.00E+00 | 0 | gama       | 0.25200   |
| 2.50E+02  | 5.18E+01  | 8.19E+01 | 0.00E+00 | 0 | tc         | 306.15537 |
| 2.51E+02  | 7.01E+01  | 8.51E+01 | 0.00E+00 | 0 |            |           |
| 2.52E+02  | 2.02E+02  | 9.05E+01 | 0.00E+00 | 0 | chi2       | 7.24E+05  |
| 2.53E+02  | 1.29E+02  | 9.53E+01 | 0.00E+00 | 0 |            |           |
| 2.55E+02  | 2.20E+02  | 1.03E+02 | 0.00E+00 | 0 |            |           |
| 2.57E+02  | 2.66E+01  | 1.16E+02 | 0.00E+00 | 0 |            |           |
| 2.58E+02  | 1.47E+02  | 1.20E+02 | 0.00E+00 | 0 |            |           |
| 2.60E+02  | 1.76E+02  | 1.32E+02 | 0.00E+00 | 0 |            |           |
| 2.62E+02  | 2.28E+02  | 1.47E+02 | 6.51E+03 | 1 |            |           |
| 2.62E+02  | 9.98E+01  | 1.50E+02 | 2.51E+03 | 1 | thre       | 260       |

|          |          |
|----------|----------|
| 2.64E+02 | 4.51E+01 |
| 2.66E+02 | 1.29E+02 |
| 2.68E+02 | 3.15E+02 |
| 2.69E+02 | 2.86E+02 |
| 2.70E+02 | 1.00E+02 |
| 2.72E+02 | 2.21E+02 |
| 2.73E+02 | 2.86E+02 |
| 2.76E+02 | 2.54E+02 |
| 2.78E+02 | 1.08E+02 |
| 2.81E+02 | 4.66E+02 |
| 2.85E+02 | 1.45E+02 |
| 2.85E+02 | 5.57E+02 |
| 2.86E+02 | 8.02E+02 |
| 2.88E+02 | 8.27E+02 |
| 2.89E+02 | 9.91E+02 |
| 2.91E+02 | 6.89E+02 |
| 2.92E+02 | 4.44E+02 |
| 2.92E+02 | 8.38E+02 |
| 2.93E+02 | 1.17E+03 |
| 2.94E+02 | 1.50E+03 |

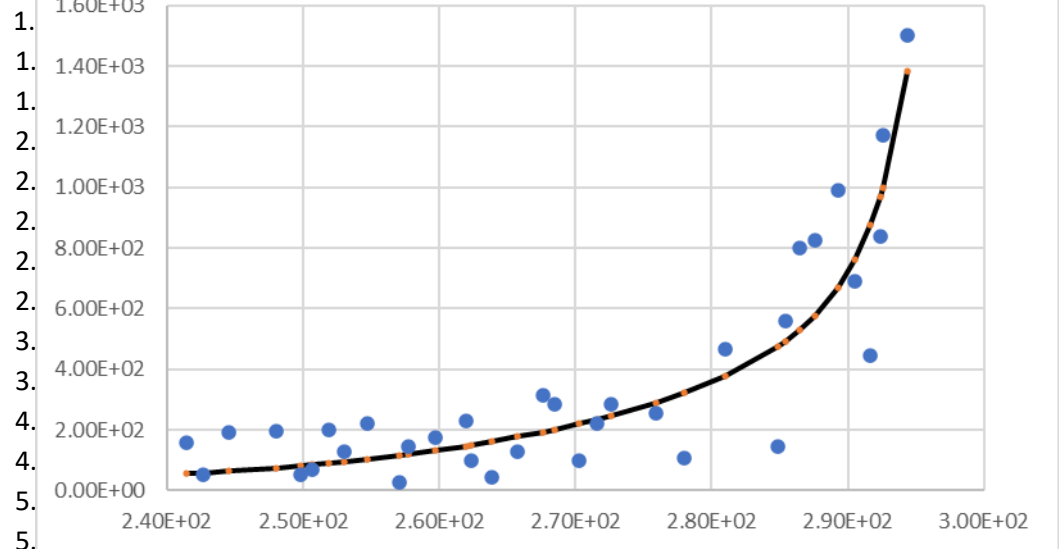

|    |          |          |   |
|----|----------|----------|---|
| 1. | 6.69E+02 | 1.04E+05 | 1 |
| 1. | 7.63E+02 | 5.60E+03 | 1 |
| 1. | 8.76E+02 | 1.86E+05 | 1 |
| 2. | 9.70E+02 | 1.73E+04 | 1 |
| 2. | 1.00E+03 | 2.91E+04 | 1 |
| 2. | 1.38E+03 | 1.39E+04 | 1 |

bulgaria

33.155



| de do    | Jeu de do | fit      | diff     | W | a0         |           |
|----------|-----------|----------|----------|---|------------|-----------|
| 2.36E+02 | 6.97E+02  | 6.96E+02 | 0.00E+00 | 0 | N          | 0.00000   |
| 2.39E+02 | 1.61E+03  | 7.68E+02 | 0.00E+00 | 0 | alpha      | 0.49293   |
| 2.42E+02 | 1.61E+03  | 8.49E+02 | 0.00E+00 | 0 | beta-alpha | 0.00336   |
| 2.43E+02 | 6.97E+02  | 8.82E+02 | 0.00E+00 | 0 | gama       | 0.25200   |
| 2.44E+02 | 1.17E+03  | 9.07E+02 | 0.00E+00 | 0 | tc         | 288.61579 |
| 2.47E+02 | 1.43E+03  | 9.97E+02 | 0.00E+00 | 0 |            |           |
| 2.49E+02 | 8.44E+02  | 1.07E+03 | 0.00E+00 | 0 | chi2       | 5.44E+07  |
| 2.50E+02 | 1.61E+03  | 1.09E+03 | 0.00E+00 | 0 |            |           |
| 2.52E+02 | 1.10E+03  | 1.16E+03 | 0.00E+00 | 0 |            |           |
| 2.53E+02 | 2.13E+03  | 1.17E+03 | 0.00E+00 | 0 |            |           |
| 2.54E+02 | 1.58E+03  | 1.23E+03 | 0.00E+00 | 0 |            |           |
| 2.55E+02 | 1.61E+03  | 1.26E+03 | 0.00E+00 | 0 |            |           |
| 2.56E+02 | 9.90E+02  | 1.32E+03 | 0.00E+00 | 0 |            |           |
| 2.60E+02 | 2.16E+03  | 1.46E+03 | 0.00E+00 | 0 | thre       | 260       |

15.616

|          |          |
|----------|----------|
| 2.61E+02 | 1.94E+03 |
| 2.61E+02 | 2.35E+03 |
| 2.64E+02 | 8.07E+02 |
| 2.64E+02 | 1.69E+03 |
| 2.66E+02 | 2.02E+03 |
| 2.69E+02 | 2.57E+03 |
| 2.70E+02 | 1.54E+03 |
| 2.71E+02 | 1.25E+03 |
| 2.72E+02 | 2.13E+03 |
| 2.73E+02 | 1.87E+03 |
| 2.75E+02 | 2.64E+03 |
| 2.77E+02 | 2.31E+03 |
| 2.78E+02 | 1.61E+03 |
| 2.79E+02 | 2.75E+03 |
| 2.81E+02 | 4.47E+03 |
| 2.83E+02 | 4.88E+03 |
| 2.86E+02 | 2.79E+03 |
| 2.88E+02 | 6.82E+03 |
| 2.90E+02 | 7.81E+03 |
| 2.91E+02 | 4.58E+03 |
| 2.92E+02 | 6.93E+03 |
| 2.93E+02 | 7.74E+03 |
| 2.94E+02 | 1.13E+04 |
| 2.96E+02 | 1.45E+04 |
| 2.97E+02 | 8.00E+03 |

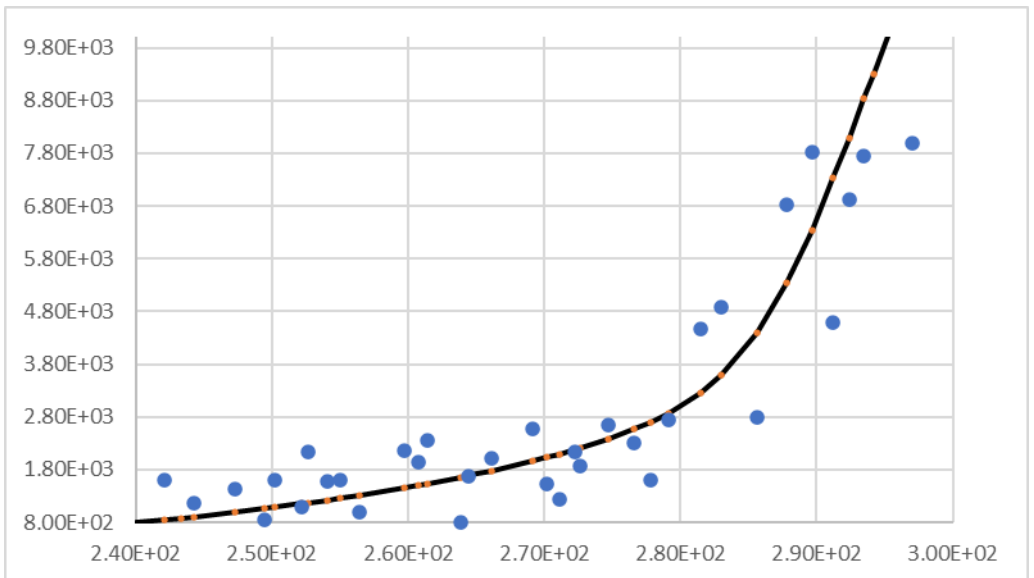

|          |          |   |
|----------|----------|---|
| 3.25E+03 | 1.49E+06 | 1 |
| 3.58E+03 | 1.67E+06 | 1 |
| 4.40E+03 | 2.59E+06 | 1 |
| 5.34E+03 | 2.20E+06 | 1 |
| 6.34E+03 | 2.17E+06 | 1 |
| 7.33E+03 | 7.52E+06 | 1 |
| 8.10E+03 | 1.36E+06 | 1 |
| 8.83E+03 | 1.20E+06 | 1 |
| 9.30E+03 | 3.83E+06 | 1 |
| 1.06E+04 | 1.58E+07 | 1 |
| 1.12E+04 | 1.02E+07 | 1 |

germany

| d  | 1fit | diff     | W        | a0 |            |          |        |
|----|------|----------|----------|----|------------|----------|--------|
| 72 | 2    | 9.26E+00 | 0.00E+00 | 0  | N          | 0.000    | 2.686  |
| 73 | 1    | 9.42E+00 | 0.00E+00 | 0  | alpha      | 0.017    |        |
| 74 | 3    | 9.58E+00 | 0.00E+00 | 0  | beta-alpha | 0.005    |        |
| 75 | 0    | 9.75E+00 | 0.00E+00 | 0  | gama       | 0.252    |        |
| 76 | 0    | 9.92E+00 | 0.00E+00 | 0  | tc         | 296.085  | 23.085 |
| 77 | 0    | 1.01E+01 | 0.00E+00 | 0  |            |          |        |
| 78 | 2    | 1.03E+01 | 0.00E+00 | 0  | chi2       | 2.24E+05 |        |
| 79 | 22   | 1.04E+01 | 0.00E+00 | 0  |            |          |        |
| 80 | 14   | 1.06E+01 | 0.00E+00 | 0  |            |          |        |
| 81 | 21   | 1.08E+01 | 0.00E+00 | 0  |            |          |        |
| 82 | 7    | 1.10E+01 | 0.00E+00 | 0  |            |          |        |
| 83 | 11   | 1.12E+01 | 0.00E+00 | 0  |            |          |        |
| 84 | 5    | 1.14E+01 | 0.00E+00 | 0  |            |          |        |
| 85 | 10   | 1.16E+01 | 0.00E+00 | 0  | thre       | 255      |        |
| 86 | 18   | 1.18E+01 | 0.00E+00 | 0  |            |          |        |
| 87 | 73   | 1.20E+01 | 0.00E+00 | 0  |            |          |        |

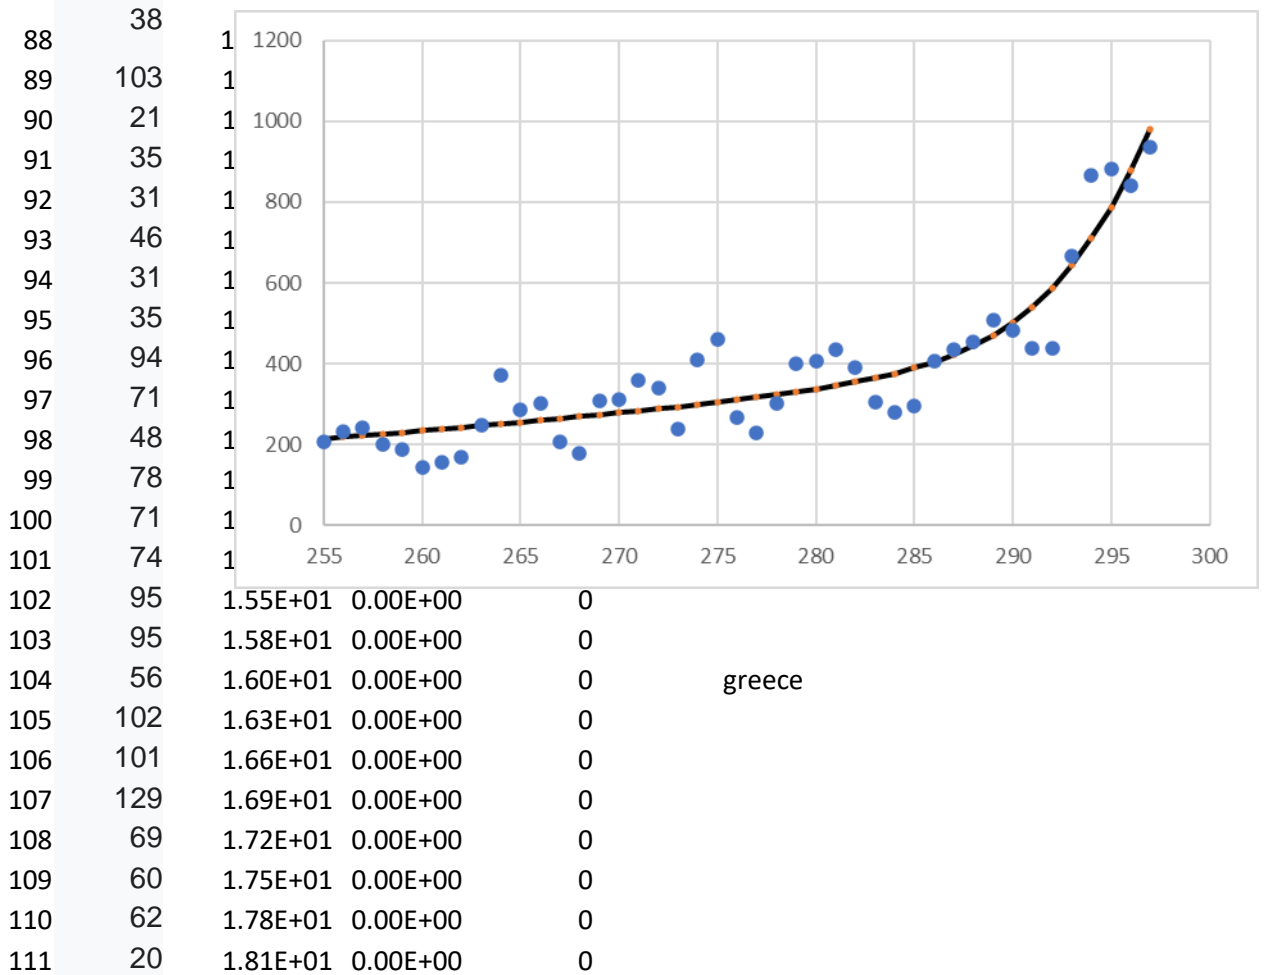

| de do    | Jeu de do | fit      | diff     | W | a0         |           |
|----------|-----------|----------|----------|---|------------|-----------|
| 2.52E+02 | 1.81E+03  | 7.57E+02 | 0.00E+00 | 0 | N          | 0.00027   |
| 2.50E+02 | 1.42E+03  | 6.69E+02 | 0.00E+00 | 0 | alpha      | 0.05878   |
| 2.54E+02 | 1.68E+03  | 8.25E+02 | 0.00E+00 | 0 | beta-alpha | 0.00228   |
| 2.57E+02 | 1.62E+03  | 9.79E+02 | 0.00E+00 | 0 | gama       | 0.25200   |
| 2.59E+02 | 1.75E+03  | 1.12E+03 | 0.00E+00 | 0 | tc         | 290.95776 |
| 2.61E+02 | 2.01E+03  | 1.28E+03 | 5.24E+05 | 1 |            |           |
| 2.65E+02 | 1.43E+03  | 1.58E+03 | 2.27E+04 | 1 | chi2       | 1.95E+07  |
| 2.69E+02 | 2.33E+03  | 2.05E+03 | 7.98E+04 | 1 |            |           |
| 2.71E+02 | 1.82E+03  | 2.32E+03 | 2.52E+05 | 1 |            |           |
| 2.73E+02 | 2.14E+03  | 2.60E+03 | 2.10E+05 | 1 |            |           |
| 2.74E+02 | 2.72E+03  | 2.77E+03 | 2.55E+03 | 1 |            |           |
| 2.76E+02 | 3.18E+03  | 3.12E+03 | 3.41E+03 | 1 |            |           |
| 2.78E+02 | 2.41E+03  | 3.56E+03 | 1.33E+06 | 1 |            |           |

17.958

|          |          |
|----------|----------|
| 2.81E+02 | 4.66E+03 |
| 2.83E+02 | 6.20E+03 |
| 2.85E+02 | 4.79E+03 |
| 2.89E+02 | 9.87E+03 |
| 2.91E+02 | 1.17E+04 |
| 2.92E+02 | 9.94E+03 |
| 2.94E+02 | 1.15E+04 |
| 2.95E+02 | 1.48E+04 |
| 2.95E+02 | 1.64E+04 |
| 2.97E+02 | 1.91E+04 |
| 2.99E+02 | 2.07E+04 |

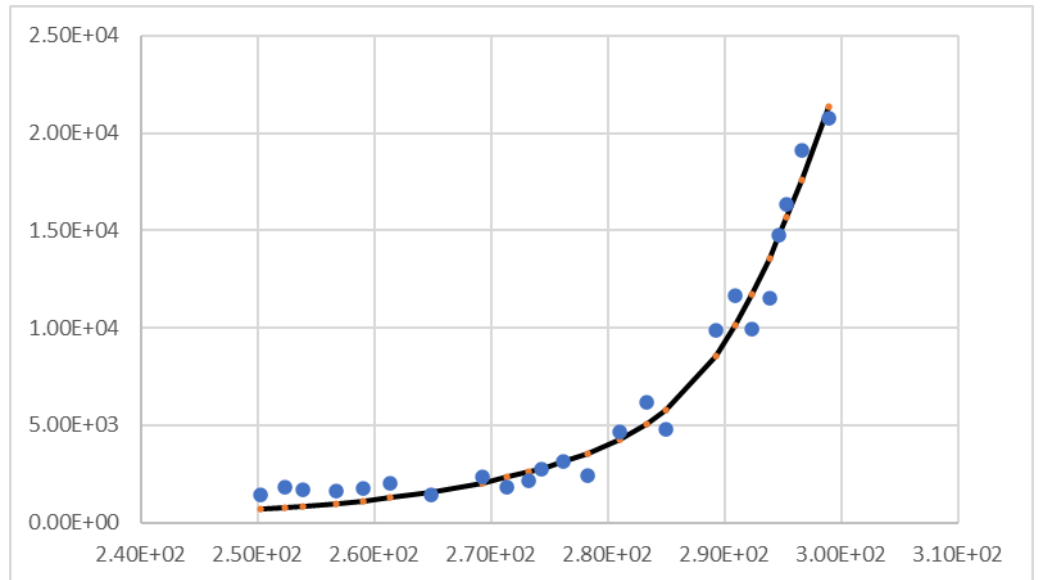

italy



| Jeu de do | Jeu de do | fit      | diff     | W | a0         |           |
|-----------|-----------|----------|----------|---|------------|-----------|
| 2.29E+02  | 3.32E+02  | 9.39E+01 | 0.00E+00 | 0 | N          | 0.00000   |
| 2.31E+02  | 3.31E+02  | 1.06E+02 | 0.00E+00 | 0 | alpha      | 0.07600   |
| 2.33E+02  | 2.76E+02  | 1.24E+02 | 0.00E+00 | 0 | beta-alpha | 0.00010   |
| 2.35E+02  | 2.76E+02  | 1.45E+02 | 0.00E+00 | 0 | gama       | 0.25200   |
| 2.38E+02  | 3.29E+02  | 1.75E+02 | 0.00E+00 | 0 | tc         | 276.94690 |
| 2.39E+02  | 2.74E+02  | 1.98E+02 | 0.00E+00 | 0 |            |           |
| 2.42E+02  | 2.73E+02  | 2.54E+02 | 0.00E+00 | 0 | chi2       | 7.46E+06  |
| 2.44E+02  | 3.54E+02  | 2.96E+02 | 0.00E+00 | 0 |            |           |
| 2.46E+02  | 7.89E+02  | 3.41E+02 | 0.00E+00 | 0 |            |           |
| 2.48E+02  | 2.17E+02  | 3.74E+02 | 0.00E+00 | 0 |            |           |
| 2.48E+02  | 5.71E+02  | 3.92E+02 | 0.00E+00 | 0 |            |           |
| 2.49E+02  | 4.62E+02  | 4.17E+02 | 0.00E+00 | 0 |            |           |
| 2.50E+02  | 7.88E+02  | 4.65E+02 | 1.04E+05 | 1 |            |           |
| 2.51E+02  | 5.97E+02  | 4.95E+02 | 1.05E+04 | 1 | thre       | 250       |

|          |          |
|----------|----------|
| 2.53E+02 | 9.77E+02 |
| 2.54E+02 | 5.69E+02 |
| 2.55E+02 | 1.14E+03 |
| 2.57E+02 | 8.13E+02 |
| 2.57E+02 | 1.14E+03 |
| 2.59E+02 | 1.17E+03 |
| 2.61E+02 | 1.55E+03 |
| 2.62E+02 | 1.82E+03 |
| 2.64E+02 | 1.71E+03 |
| 2.65E+02 | 2.09E+03 |
| 2.67E+02 | 2.09E+03 |
| 2.69E+02 | 2.39E+03 |
| 2.69E+02 | 2.66E+03 |
| 2.70E+02 | 2.55E+03 |
| 2.71E+02 | 2.90E+03 |
| 2.72E+02 | 2.77E+03 |
| 2.73E+02 | 2.90E+03 |
| 2.74E+02 | 3.18E+03 |
| 2.76E+02 | 3.09E+03 |
| 2.76E+02 | 3.50E+03 |
| 2.76E+02 | 3.77E+03 |
| 2.78E+02 | 3.88E+03 |
| 2.79E+02 | 4.23E+03 |

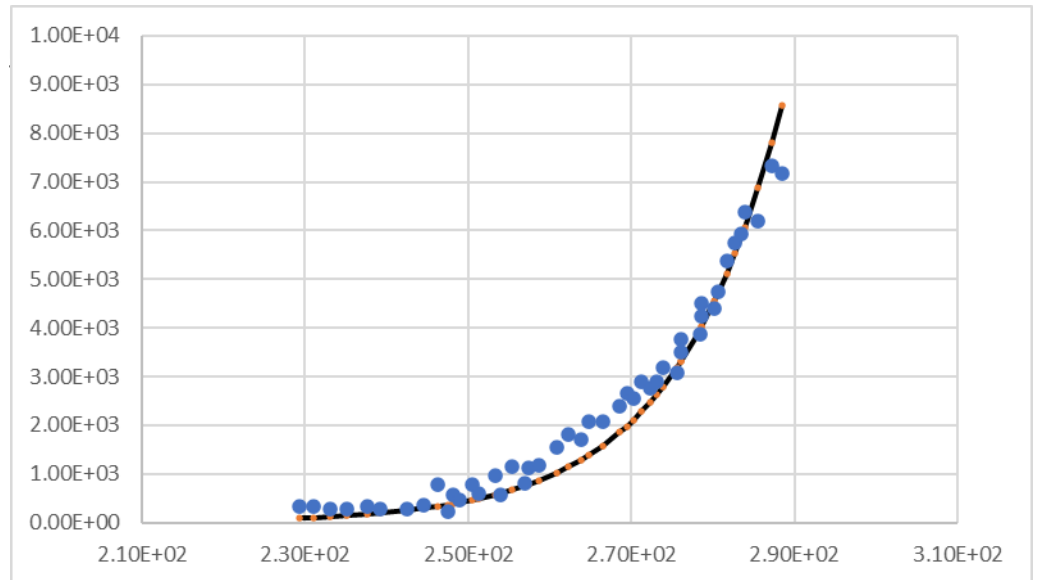

|          |          |   |
|----------|----------|---|
| 2.28E+03 | 3.94E+05 | 1 |
| 2.46E+03 | 9.28E+04 | 1 |
| 2.62E+03 | 7.83E+04 | 1 |
| 2.79E+03 | 1.45E+05 | 1 |
| 3.17E+03 | 6.41E+03 | 1 |
| 3.33E+03 | 3.00E+04 | 1 |
| 3.33E+03 | 1.98E+05 | 1 |
| 3.96E+03 | 6.76E+03 | 1 |
| 4.03E+03 | 4.33E+04 | 1 |

netherland

3.947

| Jeu de do | Jeu de do | fit      | diff     | W | a0         |          |
|-----------|-----------|----------|----------|---|------------|----------|
| 1.91E+02  | 6.44E+02  | 4.44E+01 | 0.00E+00 | 0 | N          | 0.000    |
| 1.92E+02  | 5.27E+02  | 4.55E+01 | 0.00E+00 | 0 | alpha      | 0.040    |
| 1.92E+02  | 3.77E+02  | 4.61E+01 | 0.00E+00 | 0 | beta-alpha | 0.004    |
| 1.93E+02  | 3.13E+02  | 4.78E+01 | 0.00E+00 | 0 | gama       | 0.252    |
| 1.95E+02  | 3.46E+02  | 5.05E+01 | 0.00E+00 | 0 | tc         | 298.753  |
| 1.95E+02  | 2.49E+02  | 5.14E+01 | 0.00E+00 | 0 |            |          |
| 1.96E+02  | 4.21E+02  | 5.27E+01 | 0.00E+00 | 0 | chi2       | 3.00E+06 |
| 1.97E+02  | 3.78E+02  | 5.44E+01 | 0.00E+00 | 0 |            |          |
| 1.98E+02  | 3.57E+02  | 5.61E+01 | 0.00E+00 | 0 |            |          |
| 1.99E+02  | 3.47E+02  | 5.85E+01 | 0.00E+00 | 0 |            |          |
| 2.00E+02  | 2.61E+02  | 6.11E+01 | 0.00E+00 | 0 |            |          |
| 2.01E+02  | 1.55E+02  | 6.37E+01 | 0.00E+00 | 0 |            |          |
| 2.02E+02  | 1.55E+02  | 6.57E+01 | 0.00E+00 | 0 |            |          |
| 2.03E+02  | 2.83E+02  | 6.86E+01 | 0.00E+00 | 0 | thre       | 260      |
| 2.04E+02  | 2.57E+02  | 7.14E+01 | 0.00E+00 | 0 |            |          |
| 2.06E+02  | 2.95E+02  | 7.76E+01 | 0.00E+00 | 0 |            |          |
| 2.07E+02  | 2.42E+02  | 7.95E+01 | 0.00E+00 | 0 |            |          |

25.753

|          |          |
|----------|----------|
| 2.09E+02 | 1.41E+02 |
| 2.10E+02 | 2.37E+02 |
| 2.11E+02 | 2.85E+02 |
| 2.12E+02 | 2.43E+02 |
| 2.13E+02 | 2.75E+02 |
| 2.14E+02 | 1.90E+02 |
| 2.15E+02 | 1.43E+02 |
| 2.16E+02 | 1.43E+02 |
| 2.17E+02 | 1.91E+02 |
| 2.18E+02 | 2.55E+02 |
| 2.19E+02 | 3.35E+02 |
| 2.20E+02 | 2.18E+02 |
| 2.21E+02 | 1.55E+02 |
| 2.22E+02 | 1.92E+02 |
| 2.23E+02 | 1.45E+02 |
| 2.24E+02 | 2.25E+02 |
| 2.24E+02 | 3.10E+02 |
| 2.25E+02 | 3.58E+02 |
| 2.26E+02 | 2.78E+02 |
| 2.27E+02 | 2.36E+02 |
| 2.28E+02 | 1.46E+02 |
| 2.29E+02 | 1.62E+02 |
| 2.30E+02 | 2.58E+02 |
| 2.31E+02 | 2.85E+02 |

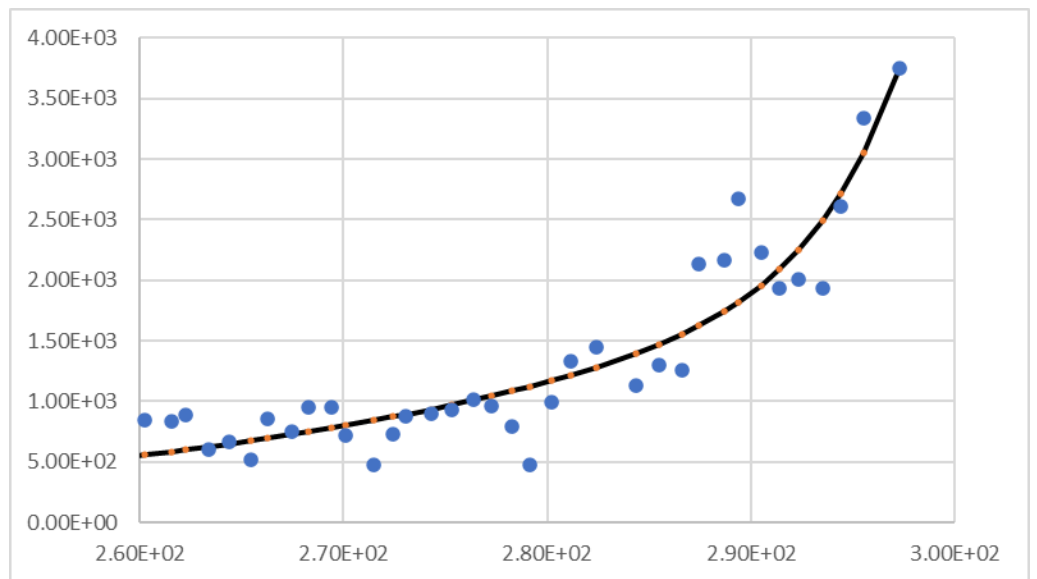

|          |          |   |
|----------|----------|---|
| 1.43E+02 | 0.00E+00 | 0 |
| 1.45E+02 | 0.00E+00 | 0 |
| 1.48E+02 | 0.00E+00 | 0 |
| 1.56E+02 | 0.00E+00 | 0 |
| 1.60E+02 | 0.00E+00 | 0 |
| 1.66E+02 | 0.00E+00 | 0 |
| 1.71E+02 | 0.00E+00 | 0 |
| 1.78E+02 | 0.00E+00 | 0 |
| 1.85E+02 | 0.00E+00 | 0 |
| 1.92E+02 | 0.00E+00 | 0 |

Portugal

| Jeu de do | Jeu de do fit | diff     | W        | a0 | 4904.63325 |           |
|-----------|---------------|----------|----------|----|------------|-----------|
| 2.37E+02  | 4.90E+03      | 5.19E+03 | 0.00E+00 | 0  | N          | 0.00073   |
| 2.40E+02  | 5.06E+03      | 5.23E+03 | 0.00E+00 | 0  | alpha      | 0.05427   |
| 2.42E+02  | 5.33E+03      | 5.28E+03 | 2.25E+03 | 1  | beta-alpha | 0.00319   |
| 2.44E+02  | 4.95E+03      | 5.33E+03 | 1.39E+05 | 1  | gama       | 0.25200   |
| 2.45E+02  | 5.33E+03      | 5.35E+03 | 3.61E+02 | 1  | tc         | 265.50053 |
| 2.47E+02  | 5.45E+03      | 5.40E+03 | 2.18E+03 | 1  |            |           |
| 2.49E+02  | 5.64E+03      | 5.45E+03 | 3.75E+04 | 1  | chi2       | 9.28E+05  |
| 2.51E+02  | 5.49E+03      | 5.51E+03 | 2.12E+02 | 1  |            |           |
| 2.53E+02  | 5.65E+03      | 5.59E+03 | 3.57E+03 | 1  |            |           |
| 2.54E+02  | 5.84E+03      | 5.63E+03 | 4.31E+04 | 1  |            |           |
| 2.56E+02  | 5.80E+03      | 5.74E+03 | 4.26E+03 | 1  |            |           |
| 2.58E+02  | 5.85E+03      | 5.90E+03 | 2.76E+03 | 1  |            |           |
| 2.60E+02  | 6.08E+03      | 6.08E+03 | 3.17E+00 | 1  |            |           |

-7.499

|          |          |   |
|----------|----------|---|
| 2.62E+02 | 6.31E+03 | 6 |
| 2.63E+02 | 6.54E+03 | 6 |
| 2.65E+02 | 6.50E+03 | 6 |
| 2.67E+02 | 6.88E+03 | 7 |
| 2.68E+02 | 7.60E+03 | 7 |
| 2.70E+02 | 8.14E+03 | 7 |
| 2.71E+02 | 8.55E+03 | 8 |
| 2.77E+02 | 1.09E+04 | 1 |
| 2.80E+02 | 1.15E+04 | 1 |
| 2.81E+02 | 1.22E+04 | 1 |
| 2.82E+02 | 1.30E+04 | 1 |
| 2.84E+02 | 1.40E+04 | 1 |

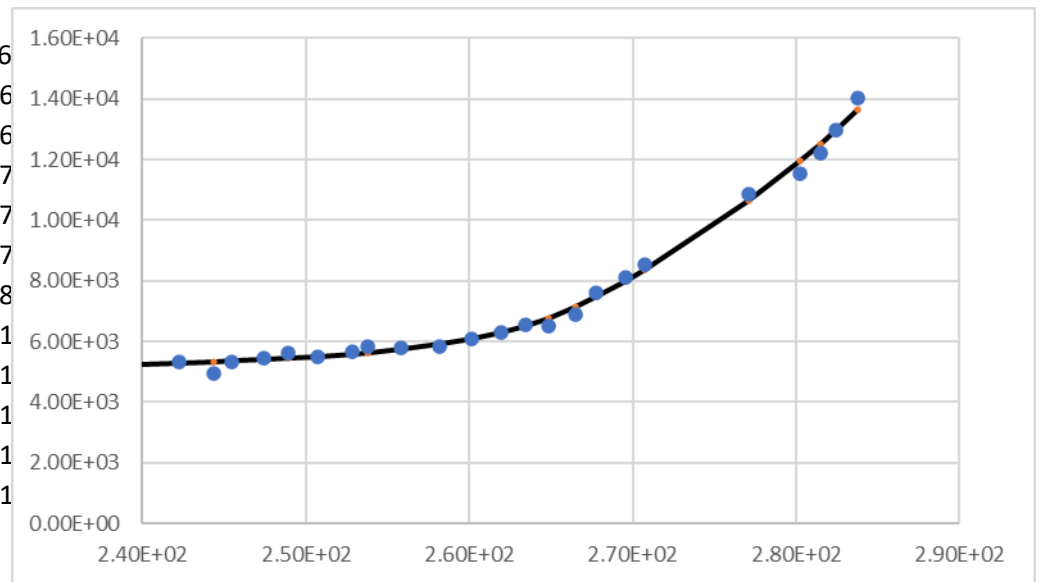

russia

| d  | N  | fit      | diff     | W | a0         | 0.00000   |
|----|----|----------|----------|---|------------|-----------|
| 67 | 0  | 6.00E-02 | 0.00E+00 | 0 | N          | 0.00580   |
| 68 | 0  | 6.21E-02 | 0.00E+00 | 0 | alpha      | 0.03486   |
| 69 | 1  | 6.43E-02 | 0.00E+00 | 0 | beta-alpha | 0.00615   |
| 70 | 3  | 6.66E-02 | 0.00E+00 | 0 | gama       | 0.25200   |
| 71 | 13 | 6.89E-02 | 0.00E+00 | 0 | tc         | 294.05047 |
| 72 | 6  | 7.14E-02 | 0.00E+00 | 0 |            |           |
| 73 | 11 | 7.39E-02 | 0.00E+00 | 0 | chi2       | 1.10E+05  |
| 74 | 11 | 7.65E-02 | 0.00E+00 | 0 |            |           |
| 75 | 2  | 7.93E-02 | 0.00E+00 | 0 |            |           |
| 76 | 9  | 8.21E-02 | 0.00E+00 | 0 |            |           |
| 77 | 15 | 8.50E-02 | 0.00E+00 | 0 |            |           |
| 78 | 17 | 8.80E-02 | 0.00E+00 | 0 |            |           |
| 79 | 14 | 9.11E-02 | 0.00E+00 | 0 |            |           |
| 80 | 32 | 9.44E-02 | 0.00E+00 | 0 | thre       | 265       |
| 81 | 36 | 9.77E-02 | 0.00E+00 | 0 |            |           |
| 82 | 51 | 1.01E-01 | 0.00E+00 | 0 |            |           |
| 83 | 27 | 1.05E-01 | 0.00E+00 | 0 |            |           |

21.050

|     |     |          |
|-----|-----|----------|
| 84  | 54  | 1.0      |
| 85  | 81  | 1.1      |
| 86  | 73  | 1.1      |
| 87  | 71  | 1.2      |
| 88  | 131 | 1.2      |
| 89  | 82  | 1.2      |
| 90  | 44  | 1.3      |
| 91  | 115 | 1.3      |
| 92  | 160 | 1.4      |
| 93  | 111 | 1.4      |
| 94  | 305 | 1.5      |
| 95  | 148 | 1.5      |
| 96  | 284 | 1.6      |
| 97  | 292 | 1.7      |
| 98  | 247 | 1.77E-01 |
| 99  | 219 | 1.83E-01 |
| 100 | 201 | 1.89E-01 |
| 101 | 238 | 1.96E-01 |
| 102 | 275 | 2.03E-01 |
| 103 | 250 | 2.10E-01 |
| 104 | 424 | 2.18E-01 |
| 105 | 411 | 2.26E-01 |
| 106 | 408 | 2.34E-01 |

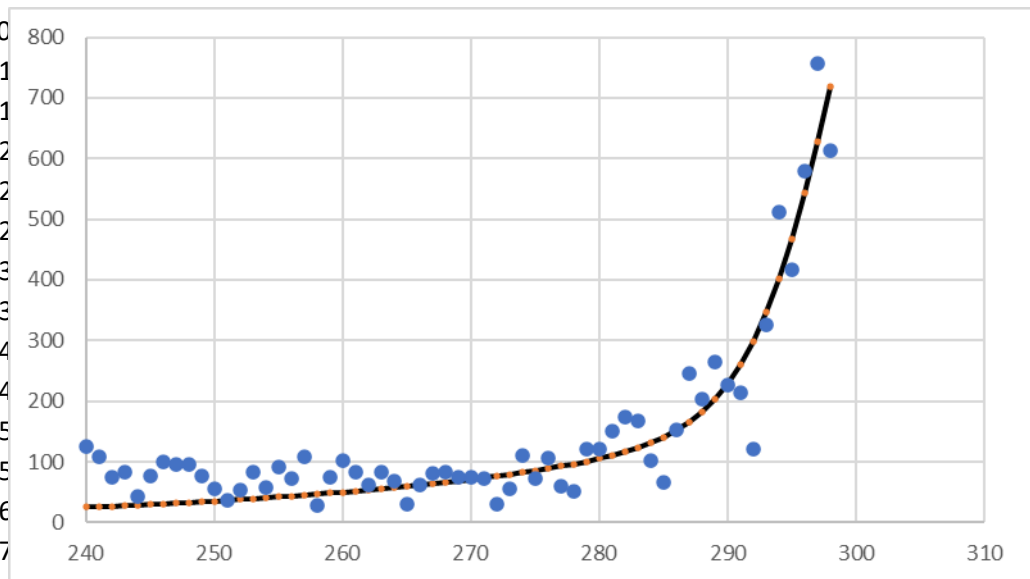

serbia

| Jeu de do | Jeu de do | fit      | diff     | W | a0         |           |
|-----------|-----------|----------|----------|---|------------|-----------|
| 2.36E+02  | 4.12E+01  | 7.17E+01 | 0.00E+00 | 0 | N          | 0.00000   |
| 2.38E+02  | 5.87E+01  | 7.54E+01 | 0.00E+00 | 0 | alpha      | 0.06882   |
| 2.40E+02  | 6.60E+01  | 8.12E+01 | 0.00E+00 | 0 | beta-alpha | 0.00759   |
| 2.43E+02  | 3.20E+01  | 8.80E+01 | 0.00E+00 | 0 | gama       | 0.25200   |
| 2.47E+02  | 7.06E+01  | 1.00E+02 | 0.00E+00 | 0 | tc         | 289.19856 |
| 2.49E+02  | 7.08E+01  | 1.05E+02 | 0.00E+00 | 0 |            |           |
| 2.50E+02  | 4.00E+01  | 1.08E+02 | 0.00E+00 | 0 | chi2       | 1.45E+06  |
| 2.52E+02  | 1.16E+02  | 1.15E+02 | 0.00E+00 | 0 |            |           |
| 2.54E+02  | 1.40E+02  | 1.21E+02 | 0.00E+00 | 0 |            |           |
| 2.56E+02  | 1.30E+02  | 1.28E+02 | 0.00E+00 | 0 |            |           |
| 2.57E+02  | 6.18E+01  | 1.34E+02 | 0.00E+00 | 0 |            |           |
| 2.59E+02  | 1.58E+02  | 1.41E+02 | 0.00E+00 | 0 |            |           |
| 2.60E+02  | 1.31E+02  | 1.45E+02 | 0.00E+00 | 0 |            |           |
| 2.61E+02  | 1.72E+02  | 1.50E+02 | 0.00E+00 | 0 | thre       | 265       |
| 2.62E+02  | 1.45E+02  | 1.54E+02 | 0.00E+00 | 0 |            |           |

16.199

|          |          |          |          |   |
|----------|----------|----------|----------|---|
| 2.63E+02 | 1.42E+02 | 1        |          |   |
| 2.64E+02 | 6.63E+01 | 1        |          |   |
| 2.66E+02 | 1.70E+02 | 1        |          |   |
| 2.66E+02 | 1.56E+02 | 1        |          |   |
| 2.67E+02 | 2.25E+02 | 1        |          |   |
| 2.70E+02 | 1.94E+02 | 1        |          |   |
| 2.72E+02 | 2.43E+02 | 2        |          |   |
| 2.74E+02 | 2.09E+02 | 2        |          |   |
| 2.78E+02 | 8.58E+01 | 2        |          |   |
| 2.79E+02 | 3.85E+02 | 2        |          |   |
| 2.82E+02 | 3.99E+02 | 3        |          |   |
| 2.83E+02 | 4.58E+02 | 4        |          |   |
| 2.85E+02 | 2.21E+02 | 5        |          |   |
| 2.85E+02 | 7.57E+02 | 5        |          |   |
| 2.86E+02 | 7.88E+02 | 6.43E+02 | 2.11E+04 | 1 |
| 2.90E+02 | 6.03E+02 | 1.22E+03 | 3.84E+05 | 1 |
| 2.91E+02 | 8.51E+02 | 1.48E+03 | 3.96E+05 | 1 |
| 2.90E+02 | 1.54E+03 | 1.18E+03 | 1.36E+05 | 1 |
| 2.90E+02 | 1.70E+03 | 1.28E+03 | 1.78E+05 | 1 |
| 2.92E+02 | 1.71E+03 | 1.70E+03 | 1.45E+02 | 1 |
| 2.92E+02 | 2.00E+03 | 1.61E+03 | 1.49E+05 | 1 |

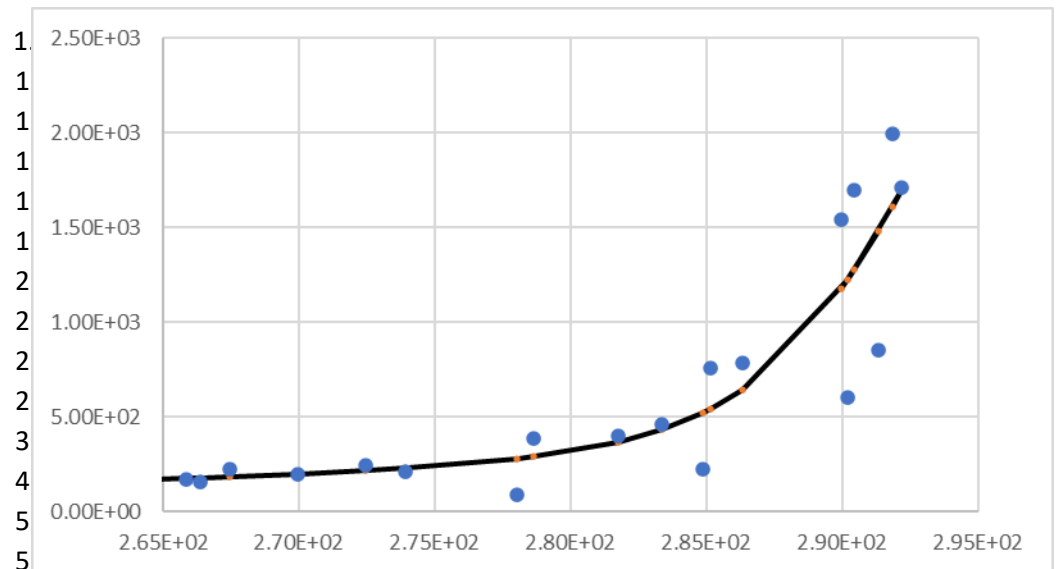

slovenia

| de do    | Jeu de do | fit      | diff     | W | a0         |          |
|----------|-----------|----------|----------|---|------------|----------|
| 2.48E+02 | 4.81E+02  | 3.55E+02 | 0.00E+00 | 0 | N          | 0.000    |
| 2.49E+02 | 3.12E+02  | 3.67E+02 | 0.00E+00 | 0 | alpha      | 0.025    |
| 2.50E+02 | 2.45E+02  | 3.84E+02 | 0.00E+00 | 0 | beta-alpha | 0.008    |
| 2.51E+02 | 3.93E+02  | 3.95E+02 | 3.13E+00 | 1 | gama       | 0.252    |
| 2.52E+02 | 6.37E+02  | 4.13E+02 | 5.00E+04 | 1 | tc         | 302.357  |
| 2.53E+02 | 5.76E+02  | 4.27E+02 | 2.22E+04 | 1 |            |          |
| 2.54E+02 | 6.84E+02  | 4.46E+02 | 5.65E+04 | 1 | chi2       | 2.70E+06 |
| 2.55E+02 | 4.88E+02  | 4.63E+02 | 6.29E+02 | 1 |            |          |
| 2.56E+02 | 6.84E+02  | 4.82E+02 | 4.08E+04 | 1 |            |          |
| 2.57E+02 | 6.10E+02  | 5.00E+02 | 1.20E+04 | 1 |            |          |
| 2.58E+02 | 4.20E+02  | 5.23E+02 | 1.05E+04 | 1 |            |          |
| 2.59E+02 | 6.03E+02  | 5.42E+02 | 3.67E+03 | 1 |            |          |
| 2.60E+02 | 7.72E+02  | 5.58E+02 | 4.58E+04 | 1 |            |          |
| 2.61E+02 | 7.72E+02  | 5.81E+02 | 3.64E+04 | 1 | thre       | 250      |
| 2.63E+02 | 5.62E+02  | 6.25E+02 | 3.96E+03 | 1 |            |          |

|          |          |
|----------|----------|
| 2.64E+02 | 6.03E+02 |
| 2.65E+02 | 4.61E+02 |
| 2.66E+02 | 7.99E+02 |
| 2.67E+02 | 7.04E+02 |
| 2.68E+02 | 8.94E+02 |
| 2.69E+02 | 8.80E+02 |
| 2.70E+02 | 6.64E+02 |
| 2.71E+02 | 4.14E+02 |
| 2.72E+02 | 6.97E+02 |
| 2.73E+02 | 8.26E+02 |
| 2.74E+02 | 8.53E+02 |
| 2.75E+02 | 8.73E+02 |
| 2.76E+02 | 9.75E+02 |
| 2.77E+02 | 8.87E+02 |
| 2.80E+02 | 9.54E+02 |
| 2.81E+02 | 1.27E+03 |
| 2.82E+02 | 1.39E+03 |
| 2.83E+02 | 1.66E+03 |
| 2.84E+02 | 1.08E+03 |
| 2.86E+02 | 1.21E+03 |
| 2.87E+02 | 2.07E+03 |
| 2.88E+02 | 2.10E+03 |

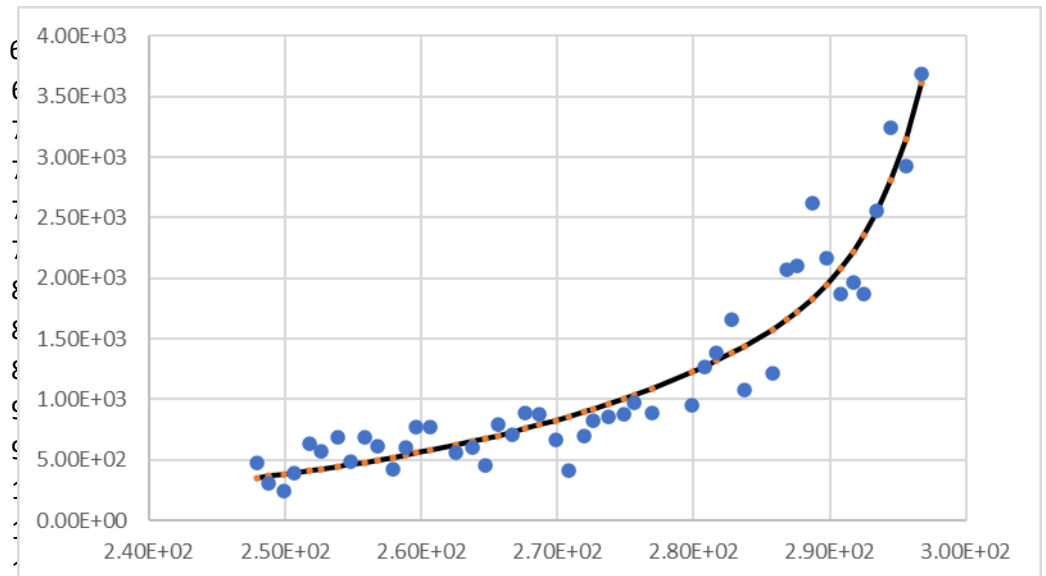

|          |          |   |
|----------|----------|---|
| 1.23E+03 | 7.37E+04 | 1 |
| 1.27E+03 | 3.67E+00 | 1 |
| 1.32E+03 | 4.62E+03 | 1 |
| 1.38E+03 | 7.81E+04 | 1 |
| 1.44E+03 | 1.34E+05 | 1 |
| 1.58E+03 | 1.35E+05 | 1 |
| 1.66E+03 | 1.68E+05 | 1 |
| 1.72E+03 | 1.45E+05 |   |

spain

29.357

| Jeu de do | Jeu de do | fit      | diff     | W | t1/2     | a0         |          |        |
|-----------|-----------|----------|----------|---|----------|------------|----------|--------|
| 2.05E+02  | 1.40E+02  | 2.04E+02 | 4.09E+03 | 1 |          | N          | 204.167  | 0.000  |
| 2.06E+02  | 3.28E+01  | 2.04E+02 | 2.94E+04 | 1 | 9.61E+06 | alpha      |          | 0.000  |
| 2.08E+02  | 1.08E+02  | 2.04E+02 | 9.21E+03 | 1 | 6.87E+06 | beta-alpha |          | 0.005  |
| 2.09E+02  | 2.70E+02  | 2.04E+02 | 4.29E+03 | 1 | 4.97E+06 | gama       |          | 0.252  |
| 2.10E+02  | 2.86E+02  | 2.04E+02 | 6.68E+03 | 1 | 3.66E+06 | tc         | 265.644  | -7.356 |
| 2.12E+02  | 2.75E+02  | 2.04E+02 | 5.07E+03 | 1 | 2.35E+06 |            |          |        |
| 2.13E+02  | 1.36E+02  | 2.04E+02 | 4.69E+03 | 1 | 1.59E+06 | chi2       | 9.29E+05 |        |
| 2.14E+02  | 1.74E+01  | 2.04E+02 | 3.49E+04 | 1 | 1.30E+06 |            |          |        |
| 2.15E+02  | 2.00E+02  | 2.04E+02 | 1.43E+01 | 1 | 1.04E+06 |            |          |        |
| 2.16E+02  | 3.35E+02  | 2.04E+02 | 1.71E+04 | 1 | 8.00E+05 |            |          |        |
| 2.17E+02  | 4.21E+02  | 2.04E+02 | 4.70E+04 | 1 | 6.49E+05 |            |          |        |
| 2.18E+02  | 3.62E+02  | 2.04E+02 | 2.49E+04 | 1 | 4.90E+05 |            |          |        |
| 2.19E+02  | 3.19E+02  | 2.04E+02 | 1.32E+04 | 1 | 3.52E+05 |            |          |        |
| 2.20E+02  | 1.90E+02  | 2.04E+02 | 1.96E+02 | 1 | 2.73E+05 | thre       | 205      |        |

|          |          |
|----------|----------|
| 2.21E+02 | 5.58E+01 |
| 2.22E+02 | 2.50E+02 |
| 2.23E+02 | 4.11E+02 |
| 2.25E+02 | 3.52E+02 |
| 2.26E+02 | 3.41E+02 |
| 2.27E+02 | 2.07E+02 |
| 2.28E+02 | 1.89E+01 |
| 2.29E+02 | 1.96E+02 |
| 2.30E+02 | 3.31E+02 |
| 2.32E+02 | 3.26E+02 |
| 2.34E+02 | 1.97E+02 |
| 2.34E+02 | 1.00E+02 |
| 2.35E+02 | 2.72E+01 |
| 2.36E+02 | 1.40E+02 |
| 2.37E+02 | 2.16E+02 |
| 2.39E+02 | 2.16E+02 |
| 2.40E+02 | 1.69E+02 |
| 2.41E+02 | 1.22E+02 |
| 2.42E+02 | 2.80E+01 |
| 2.43E+02 | 1.41E+02 |
| 2.44E+02 | 1.87E+02 |
| 2.46E+02 | 2.79E+02 |
| 2.47E+02 | 2.47E+02 |
| 2.48E+02 | 1.66E+02 |
| 2.49E+02 | 1.02E+02 |
| 2.50E+02 | 6.95E+01 |
| 2.51E+02 | 2.26E+02 |
| 2.52E+02 | 3.23E+02 |
| 2.53E+02 | 2.20E+02 |

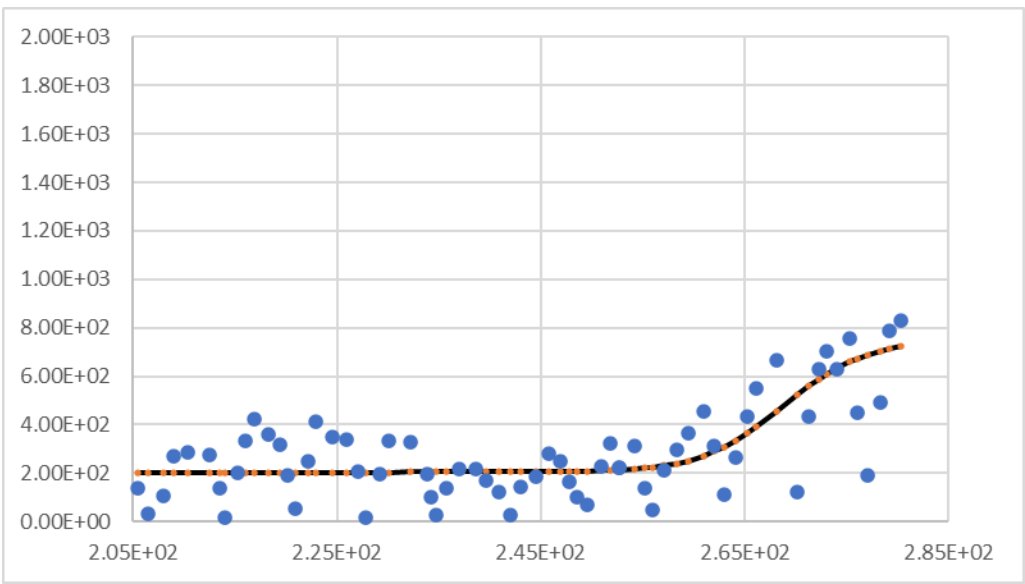

|          |          |          |          |   |          |        |
|----------|----------|----------|----------|---|----------|--------|
| 2.37E+02 | 2.16E+02 | 2.04E+02 | 1.27E+02 | 1 | 3.89E+03 |        |
| 2.39E+02 | 2.16E+02 | 2.04E+02 | 1.28E+02 | 1 | 2.68E+03 |        |
| 2.40E+02 | 1.69E+02 | 2.04E+02 | 1.27E+03 | 1 | 1.95E+03 |        |
| 2.41E+02 | 1.22E+02 | 2.05E+02 | 6.83E+03 | 1 | 1.47E+03 | sweden |
| 2.42E+02 | 2.80E+01 | 2.05E+02 | 3.12E+04 | 1 | 1.09E+03 |        |
| 2.43E+02 | 1.41E+02 | 2.05E+02 | 4.09E+03 | 1 | 8.28E+02 |        |
| 2.44E+02 | 1.87E+02 | 2.05E+02 | 3.23E+02 | 1 | 5.98E+02 |        |
| 2.46E+02 | 2.79E+02 | 2.06E+02 | 5.35E+03 | 1 | 4.20E+02 |        |
| 2.47E+02 | 2.47E+02 | 2.06E+02 | 1.64E+03 | 1 | 3.08E+02 |        |
| 2.48E+02 | 1.66E+02 | 2.07E+02 | 1.65E+03 | 1 | 2.40E+02 |        |
| 2.49E+02 | 1.02E+02 | 2.07E+02 | 1.11E+04 | 1 | 1.97E+02 |        |
| 2.50E+02 | 6.95E+01 | 2.08E+02 | 1.92E+04 | 1 | 1.58E+02 |        |
| 2.51E+02 | 2.26E+02 | 2.10E+02 | 2.48E+02 | 1 | 1.18E+02 |        |
| 2.52E+02 | 3.23E+02 | 2.11E+02 | 1.24E+04 | 1 | 8.99E+01 |        |
| 2.53E+02 | 2.20E+02 | 2.13E+02 | 5.44E+01 | 1 | 7.28E+01 |        |

| Jeu de do | Jeu de do | fit      | diff     | W | a0         |           |
|-----------|-----------|----------|----------|---|------------|-----------|
| 2.50E+02  | 1.82E+02  | 1.67E+02 | 0.00E+00 | 0 | N          | 0.08986   |
| 2.51E+02  | 2.40E+02  | 1.75E+02 | 0.00E+00 | 0 | alpha      | 0.03013   |
| 2.52E+02  | 6.07E+01  | 1.80E+02 | 0.00E+00 | 0 | beta-alpha | 0.00995   |
| 2.54E+02  | 2.39E+02  | 1.90E+02 | 0.00E+00 | 0 | gama       | 0.25200   |
| 2.56E+02  | -4.62E+01 | 2.01E+02 | 0.00E+00 | 0 | tc         | 285.17216 |
| 2.57E+02  | 8.72E+01  | 2.09E+02 | 0.00E+00 | 0 |            |           |
| 2.57E+02  | 3.56E+02  | 2.11E+02 | 0.00E+00 | 0 | chi2       | 4.03E+06  |
| 2.58E+02  | 2.06E+02  | 2.17E+02 | 0.00E+00 | 0 |            |           |
| 2.60E+02  | 3.09E+02  | 2.26E+02 | 0.00E+00 | 0 |            |           |
| 2.61E+02  | 3.08E+02  | 2.37E+02 | 5.07E+03 | 1 |            |           |
| 2.63E+02  | 8.34E+01  | 2.49E+02 | 2.74E+04 | 1 |            |           |
| 2.64E+02  | 3.21E+02  | 2.63E+02 | 3.37E+03 | 1 |            |           |
| 2.67E+02  | 2.90E+02  | 2.85E+02 | 2.67E+01 | 1 |            |           |
| 2.68E+02  | 7.67E+02  | 2.94E+02 | 2.23E+05 | 1 | thre       | 260       |

|          |           |
|----------|-----------|
| 2.69E+02 | 4.57E+00  |
| 2.71E+02 | 2.72E+02  |
| 2.72E+02 | 9.22E+01  |
| 2.73E+02 | 5.09E+02  |
| 2.75E+02 | -5.92E+01 |
| 2.77E+02 | 5.07E+02  |
| 2.78E+02 | 2.67E+02  |
| 2.78E+02 | 1.34E+03  |
| 2.80E+02 | 6.09E+02  |
| 2.82E+02 | 9.81E+02  |
| 2.83E+02 | 1.25E+03  |
| 2.85E+02 | 2.49E+03  |
| 2.86E+02 | 2.32E+03  |
| 2.87E+02 | 2.86E+03  |
| 2.89E+02 | 2.83E+03  |
| 2.89E+02 | 5.32E+03  |

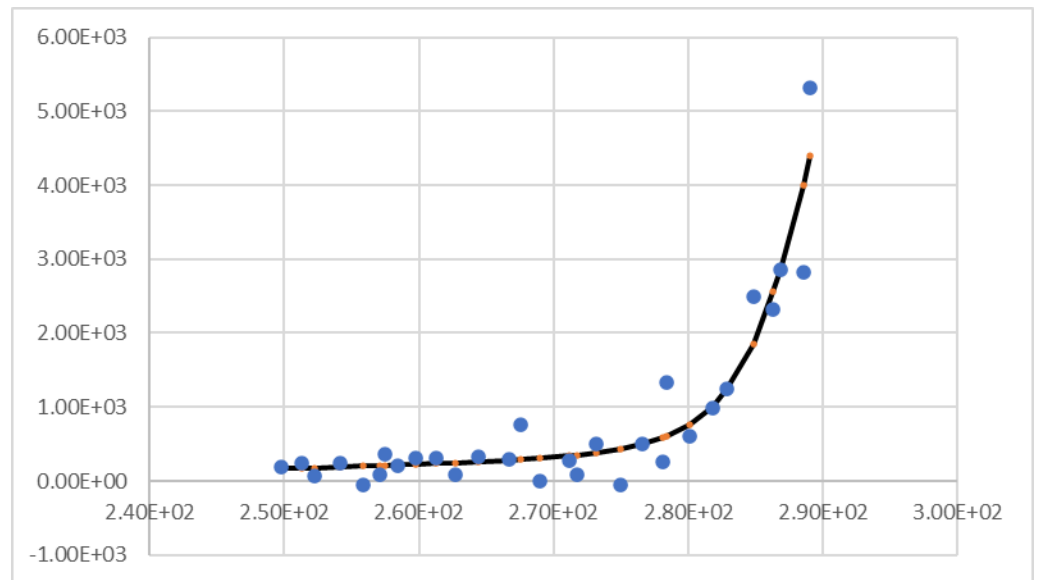

|          |          |   |
|----------|----------|---|
| 3.99E+03 | 1.36E+06 | 1 |
| 4.39E+03 | 8.56E+05 | 1 |

switzerland



| Jeu de do | Jeu de do | fit      | diff     | W | a0         |           |
|-----------|-----------|----------|----------|---|------------|-----------|
| 2.29E+02  | 9.77E+02  | 1.50E+03 | 0.00E+00 | 0 | N          | 0.00000   |
| 2.31E+02  | 1.14E+03  | 1.61E+03 | 0.00E+00 | 0 | alpha      | 1.39825   |
| 2.32E+02  | 1.30E+03  | 1.68E+03 | 0.00E+00 | 0 | beta-alpha | 0.03055   |
| 2.34E+02  | 1.46E+03  | 1.79E+03 | 0.00E+00 | 0 | gama       | 0.00268   |
| 2.36E+02  | 1.31E+03  | 1.87E+03 | 0.00E+00 | 0 | tc         | 0.25200   |
| 2.37E+02  | 1.47E+03  | 1.98E+03 | 0.00E+00 | 0 |            | 271.46302 |
| 2.40E+02  | 1.95E+03  | 2.11E+03 | 0.00E+00 | 0 | chi2       | -1.537    |
| 2.41E+02  | 1.31E+03  | 2.18E+03 | 0.00E+00 | 0 |            | 1.10E+08  |
| 2.42E+02  | 2.06E+03  | 2.24E+03 | 0.00E+00 | 0 |            |           |
| 2.44E+02  | 1.43E+03  | 2.39E+03 | 0.00E+00 | 0 |            |           |
| 2.48E+02  | 2.07E+03  | 2.71E+03 | 0.00E+00 | 0 |            |           |
| 2.49E+02  | 3.29E+03  | 2.78E+03 | 0.00E+00 | 0 |            |           |
| 2.50E+02  | 2.66E+03  | 2.94E+03 | 7.98E+04 | 1 |            |           |
| 2.53E+02  | 3.14E+03  | 3.16E+03 | 3.74E+02 | 1 | thre       | 250       |
| 2.53E+02  | 3.94E+03  | 3.24E+03 | 4.94E+05 | 1 |            |           |

|          |          |
|----------|----------|
| 2.55E+02 | 3.89E+03 |
| 2.56E+02 | 2.99E+03 |
| 2.60E+02 | 3.74E+03 |
| 2.61E+02 | 4.75E+03 |
| 2.62E+02 | 4.48E+03 |
| 2.65E+02 | 6.56E+03 |
| 2.67E+02 | 7.09E+03 |
| 2.68E+02 | 6.25E+03 |
| 2.69E+02 | 5.61E+03 |
| 2.70E+02 | 4.55E+03 |
| 2.73E+02 | 7.21E+03 |
| 2.77E+02 | 1.33E+04 |
| 2.78E+02 | 1.45E+04 |
| 2.79E+02 | 1.75E+04 |
| 2.81E+02 | 1.48E+04 |
| 2.81E+02 | 1.54E+04 |
| 2.83E+02 | 1.30E+04 |
| 2.84E+02 | 1.45E+04 |
| 2.85E+02 | 2.03E+04 |
| 2.86E+02 | 1.93E+04 |
| 2.88E+02 | 1.59E+04 |
| 2.89E+02 | 1.71E+04 |
| 2.91E+02 | 2.16E+04 |
| 2.91E+02 | 2.68E+04 |

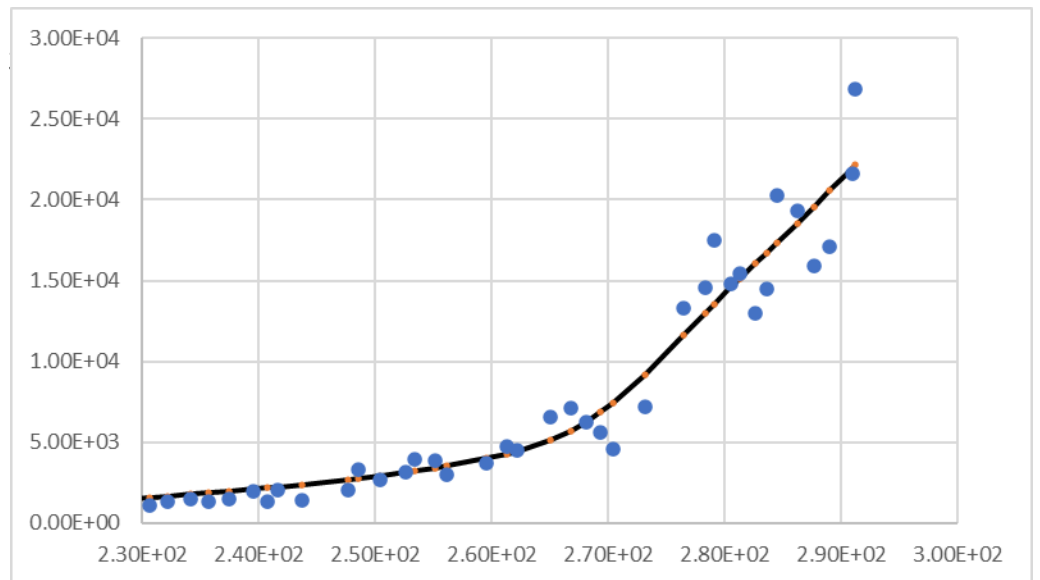

|          |          |          |          |   |
|----------|----------|----------|----------|---|
| 2.80E+02 | 1.33E+04 | 1.46E+04 | 2.21E+04 | 1 |
| 2.80E+02 | 1.45E+04 | 1.52E+04 | 6.45E+04 | 1 |
| 2.83E+02 | 1.30E+04 | 1.61E+04 | 9.67E+06 | 1 |
| 2.84E+02 | 1.45E+04 | 1.67E+04 | 4.92E+06 | 1 |
| 2.85E+02 | 2.03E+04 | 1.74E+04 | 8.56E+06 | 1 |
| 2.86E+02 | 1.93E+04 | 1.86E+04 | 6.07E+05 | 1 |
| 2.88E+02 | 1.59E+04 | 1.96E+04 | 1.31E+07 | 1 |
| 2.89E+02 | 1.71E+04 | 2.06E+04 | 1.18E+07 | 1 |
| 2.91E+02 | 2.16E+04 | 2.19E+04 | 9.77E+04 | 1 |
| 2.91E+02 | 2.68E+04 | 2.22E+04 | 2.16E+07 | 1 |

UK
